# Supplementary material for: Identification of similar epitopes between severe acute respiratory syndrome coronavirus‐2 and Bacillus Calmette–Guérin: potential for cross‐reactive adaptive immunity
Source: PubMed Central journal article supplement — Clin Transl Immunology. 2020 Dec 9;9(12):e1227. doi: 10.1002/cti2.1227 (PMC7724920; doi:10.1002/cti2.1227), 2020-12-09
Supplement: CTI2-9-e1227-s001.pdf [file CTI2-9-e1227-s001.pdf]

Supplementary Table 1. Similar MHC-I restricted BCG-Pasteur T cell epitopes and SARS-CoV-2 T cell epitopes.

| HLA SUPERTYPE | BCG PROTEIN ID | BCG PROTEIN NAME                                                          | BCG PEPTIDE | %RANK | IDENTITY % | SARS2 PEPTIDE | SARS2 PROTEIN NAME |
|---------------|----------------|---------------------------------------------------------------------------|-------------|-------|------------|---------------|--------------------|
| A02           | WP_003405938.1 | CPBP family intramembrane metalloprotease [Mycobacterium]                 | LLLAGIFGV   | 0,01  | 0,778      | LLSAGIFGA     | nsp03              |
| A02           | WP_003898761.1 | RND transporter MmpL10 [Mycobacterium]                                    | LLSAMIAGA   | 0,4   | 0,778      | LLSAGIFGA     | nsp03              |
| A02           | WP_003409205.1 | TetR/AcrR family transcriptional regulator [Mycobacterium]                | LLWAGVVGA   | 0,12  | 0,667      | LLSAGIFGA     | nsp03              |
| A02           | WP_003405320.1 | potassium-transporting ATPase subunit KdpB [Mycobacterium]                | ILSAVIFNA   | 0,15  | 0,667      | LLSAGIFGA     | nsp03              |
| A02           | WP_003898666.1 | DUF5134 domain-containing protein [Mycobacterium]                         | LLAAVWFGA   | 0,25  | 0,667      | LLSAGIFGA     | nsp03              |
| A02           | WP_003404651.1 | NAD(P)/FAD-dependent oxidoreductase [Mycobacterium]                       | LLSAGITDV   | 0,3   | 0,667      | LLSAGIFGA     | nsp03              |
| A02           | WP_011799295.1 | MATE family efflux transporter [Mycobacterium]                            | LLAAGILAA   | 0,3   | 0,667      | LLSAGIFGA     | nsp03              |
| A02           | WP_011799269.1 | LuxR family transcriptional regulator [Mycobacterium tuberculosis]        | LLLADIEGA   | 0,5   | 0,667      | LLSAGIFGA     | nsp03              |
| A02           | WP_011799327.1 | UPF0182 family protein [Mycobacterium]                                    | LLSSLIVGA   | 0,5   | 0,667      | LLSAGIFGA     | nsp03              |
| A02           | WP_010950362.1 | molybdopterin-dependent oxidoreductase [Mycobacterium]                    | YIFGFSFYT   | 0,03  | 0,667      | YIFFASFYY     | nsp03              |
| A02           | WP_010950933.1 | radical SAM protein [Mycobacterium]                                       | RLLNVEDYL   | 0,4   | 0,667      | FLLNKEMYL     | nsp04              |
| A02           | WP_003414826.1 | DivIVA domain-containing protein [Mycobacterium]                          | FLNGTLRSV   | 0,17  | 0,667      | FLNGSCGSV     | nsp05              |
| A02           | WP_003900470.1 | hypothetical protein [Mycobacterium]                                      | ALDRFTTAL   | 0,5   | 0,667      | FLNRFTTTL     | nsp05              |
| A02           | WP_003404603.1 | DUF2530 domain-containing protein [Mycobacterium]                         | ALAWLVAAV   | 0,1   | 0,778      | VLAWLYAAV     | nsp05              |
| A02           | WP_003404552.1 | molybdenum cofactor biosynthesis protein MoaE [Mycobacterium]             | VLADLVAEV   | 0,01  | 0,667      | VLAWLYAAV     | nsp05              |
| A02           | WP_003404690.1 | response regulator transcription factor [Mycobacterium]                   | VLAELVARV   | 0,06  | 0,667      | VLAWLYAAV     | nsp05              |
| A02           | WP_010950935.1 | ABC transporter substrate-binding protein [Mycobacterium]                 | GLAELNAAV   | 0,09  | 0,667      | VLAWLYAAV     | nsp05              |
| A02           | WP_010950412.1 | hypothetical protein [Mycobacterium]                                      | VLAALVVAV   | 0,09  | 0,667      | VLAWLYAAV     | nsp05              |
| A02           | WP_003904964.1 | phthiocerol type I polyketide synthase PpsE [Mycobacterium]               | TLASLTAAV   | 0,12  | 0,667      | VLAWLYAAV     | nsp05              |
| A02           | WP_011799239.1 | DEAD/DEAH box helicase [Mycobacterium]                                    | SLADDYAAV   | 0,12  | 0,667      | VLAWLYAAV     | nsp05              |
| A02           | WP_010950812.1 | Asp-tRNA(Asn)/Glu-tRNA(Gln) amidotransferase subunit GatA [Mycobacterium] | VLASFEEAV   | 0,15  | 0,667      | VLAWLYAAV     | nsp05              |

|     |                |                                                                                              |            |      |       |           |       |
|-----|----------------|----------------------------------------------------------------------------------------------|------------|------|-------|-----------|-------|
| A02 | WP_003419534.1 | membrane protein [Mycobacterium]                                                             | VLLALWAAV  | 0,15 | 0,667 | VLAWLYAAV | nsp05 |
| A02 | WP_010950811.1 | sorbosone dehydrogenase family protein [Mycobacterium]                                       | GLAALCAAV  | 0,15 | 0,667 | VLAWLYAAV | nsp05 |
| A02 | WP_003408868.1 | type VII secretion system ESX-5 AAA family ATPase EccA5 [Mycobacterium]                      | SLACAYAAV  | 0,2  | 0,667 | VLAWLYAAV | nsp05 |
| A02 | WP_003418931.1 | LppP/LprE family lipoprotein [Mycobacterium]                                                 | VLACVAAAV  | 0,25 | 0,667 | VLAWLYAAV | nsp05 |
| A02 | WP_003405305.1 | two-component system response regulator KdpE [Mycobacterium]                                 | FLARLRAAV  | 0,3  | 0,667 | VLAWLYAAV | nsp05 |
| A02 | WP_003900438.1 | acyl-CoA dehydrogenase [Mycobacterium]                                                       | GLAWCYARV  | 0,3  | 0,667 | VLAWLYAAV | nsp05 |
| A02 | WP_003417969.1 | hypothetical protein [Mycobacterium]                                                         | NLADLYDAV  | 0,3  | 0,667 | VLAWLYAAV | nsp05 |
| A02 | WP_003408868.1 | type VII secretion system ESX-5 AAA family ATPase EccA5 [Mycobacterium]                      | VLAGAWAAV  | 0,4  | 0,667 | VLAWLYAAV | nsp05 |
| A02 | WP_003899297.1 | non-ribosomal peptide synthetase [Mycobacterium]                                             | VLCELAAAV  | 0,4  | 0,667 | VLAWLYAAV | nsp05 |
| A02 | WP_003899010.1 | hypothetical protein [Mycobacterium]                                                         | VLLILLA AV | 0,4  | 0,667 | VLAWLYAAV | nsp05 |
| A02 | WP_003901785.1 | UPF0182 family protein [Mycobacterium]                                                       | VLNWL FVAV | 0,4  | 0,667 | VLAWLYAAV | nsp05 |
| A02 | WP_003400368.1 | serine/threonine phosphatase PstP [Mycobacterium]                                            | LLAKLDAAV  | 0,5  | 0,667 | VLAWLYAAV | nsp05 |
| A02 | WP_003401597.1 | L,D-transpeptidase [Mycobacterium]                                                           | LLALLCAAV  | 0,5  | 0,667 | VLAWLYAAV | nsp05 |
| A02 | WP_003419582.1 | hypothetical protein [Mycobacterium]                                                         | LLAWLTAAA  | 0,5  | 0,667 | VLAWLYAAV | nsp05 |
| A02 | WP_003401206.1 | hypothetical protein [Mycobacterium]                                                         | VLARMAAAV  | 0,5  | 0,667 | VLAWLYAAV | nsp05 |
| A02 | WP_003899696.1 | arabinosyltransferase EmbA [Mycobacterium]                                                   | VLAVLVAMV  | 0,5  | 0,667 | VLAWLYAAV | nsp05 |
| A02 | WP_003401224.1 | acyl dehydratase [Mycobacterium]                                                             | RLLPNLATV  | 0,08 | 0,778 | FLLPSLATV | nsp06 |
| A02 | WP_003419517.1 | type III pantothenate kinase [Mycobacterium]                                                 | LLLPELHTV  | 0,03 | 0,667 | FLLPSLATV | nsp06 |
| A02 | WP_003417121.1 | carbonic anhydrase [Mycobacterium]                                                           | LLL PRLTTV | 0,07 | 0,667 | FLLPSLATV | nsp06 |
| A02 | WP_003419324.1 | nitronate monooxygenase [Mycobacterium]                                                      | FLLTSDSTV  | 0,12 | 0,667 | FLLPSLATV | nsp06 |
| A02 | WP_003898943.1 | calcium:proton antiporter [Mycobacterium]                                                    | VVLPSLAFV  | 0,25 | 0,667 | FLLPSLATV | nsp06 |
| A02 | WP_003408160.1 | bifunctional glutamate N-acetyltransferase/amino-acid acetyltransferase ArgJ [Mycobacterium] | MLAPSLATM  | 0,25 | 0,667 | FLLPSLATV | nsp06 |
| A02 | WP_003405914.1 | 5-methyltetrahydropteroyltriglutamate--homocysteine S-methyltransferase [Mycobacterium]      | TLLGSAATV  | 0,5  | 0,667 | FLLPSLATV | nsp06 |
| A02 | WP_003405914.1 | 5-methyltetrahydropteroyltriglutamate--homocysteine S-methyltransferase [Mycobacterium]      | TLLGSAATV  | 0,5  | 0,667 | FLLPSLATV | nsp06 |

|     |                |                                                                                                            |            |      |       |            |       |
|-----|----------------|------------------------------------------------------------------------------------------------------------|------------|------|-------|------------|-------|
| B27 | WP_003405912.1 | DUF3556 domain-containing protein<br>[Mycobacterium]                                                       | FRAMNSHGR  | 0,25 | 0,667 | FRYMNSQGL  | nsp06 |
| A03 | WP_010950426.1 | (3R)-hydroxyacyl-ACP dehydratase<br>subunit HadB [Mycobacterium]                                           | ALREFSSVK  | 0,08 | 0,667 | ALRANSAVK  | nsp08 |
| A03 | WP_003898564.1 | signal peptide peptidase SppA<br>[Mycobacterium]                                                           | AIAAFSAVK  | 0,15 | 0,667 | ALRANSAVK  | nsp08 |
| A03 | WP_003408360.1 | alpha/beta fold hydrolase [Mycobacterium]                                                                  | ALRANGIPK  | 0,2  | 0,667 | ALRANSAVK  | nsp08 |
| A02 | WP_003408148.1 | phenylalanine--tRNA ligase subunit beta<br>[Mycobacterium]                                                 | ALFAIAQVV  | 0,4  | 0,667 | ALWEIQQVV  | nsp08 |
| A02 | WP_003410018.1 | Cd(II)/Pb(II)-sensing metalloregulatory<br>transcriptional regulator CmtR<br>[Mycobacterium]               | ALGELVQVV  | 0,5  | 0,667 | ALWEIQQVV  | nsp08 |
| A03 | WP_011799303.1 | AMP-binding protein [Mycobacterium]                                                                        | ATVYVATSK  | 0,5  | 0,667 | ATVVIGTSK  | nsp12 |
| A02 | WP_010950383.1 | isoniazid-induced protein IniA<br>[Mycobacterium]                                                          | FVDDISFVV  | 0,03 | 0,667 | FVDGVPFVV  | nsp12 |
| A01 | WP_010950383.1 | isoniazid-induced protein IniA<br>[Mycobacterium]                                                          | FVDDISFVV  | 0,5  | 0,667 | FVDGVPFVV  | nsp12 |
| A01 | WP_003901660.1 | acyl-CoA synthetase [Mycobacterium<br>tuberculosis complex]                                                | GSDQDYRRY  | 0,3  | 0,667 | ISDYDYRY   | nsp12 |
| A02 | WP_003399771.1 | hypothetical protein [Mycobacterium]<br>HlyC/CorC family transporter                                       | LLAPILTPV  | 0,01 | 0,667 | LLMPILTLT  | nsp12 |
| A02 | WP_003412229.1 | [Mycobacterium]                                                                                            | LLMPISRLL  | 0,3  | 0,667 | LLMPILTLT  | nsp12 |
| A02 | WP_003900282.1 | mannosyltransferase [Mycobacterium]<br>UDP-galactopyranose mutase                                          | RILGWGWLV  | 0,1  | 0,667 | RILGAGCFV  | nsp12 |
| A02 | WP_003420798.1 | [Mycobacterium]                                                                                            | RTLDFEVEV  | 0,5  | 0,667 | RQLLFVVEV  | nsp12 |
| A02 | WP_003898943.1 | calcium:proton antiporter [Mycobacterium]<br>polyprenyl-diphosphate synthase GrcC                          | VLFLFTQTV  | 0,25 | 0,667 | ILGLPTQTV  | nsp13 |
| B07 | WP_003405136.1 | [Mycobacterium]                                                                                            | QPRRALATL  | 0,02 | 0,667 | IPRRNVATL  | nsp13 |
| B07 | WP_003402286.1 | DUF5078 domain-containing protein<br>[Mycobacterium]                                                       | IPRRMIATT  | 0,17 | 0,667 | IPRRNVATL  | nsp13 |
| B07 | WP_010950351.1 | PE-PPE domain-containing protein<br>[Mycobacterium]                                                        | IPGLNVTTL  | 0,4  | 0,667 | IPRRNVATL  | nsp13 |
| A02 | WP_003419780.1 | RDD family protein [Mycobacterium]<br>two-component system sensor histidine<br>kinase DevS [Mycobacterium] | IIFTVLALV  | 0,3  | 0,667 | IVDTVSAV   | nsp13 |
| A03 | WP_003416363.1 | hypothetical protein [Mycobacterium]                                                                       | RLVAAEALK  | 0,4  | 0,667 | KLFAAETLK  | nsp13 |
| A03 | WP_003416868.1 | class I SAM-dependent methyltransferase<br>[Mycobacterium]                                                 | VVYRVTGTK  | 0,02 | 0,667 | VVYRGTTTTY | nsp13 |
| B58 | WP_003413866.1 | phospholipase C [Mycobacterium<br>tuberculosis]                                                            | ITYLGTTTTY | 0,4  | 0,667 | VVYRGTTTTY | nsp13 |
| A02 | WP_003916382.1 | [Mycobacterium]                                                                                            | YLLADAFTV  | 0,01 | 0,667 | ALLADKFPV  | nsp14 |

|     |                |                                                                     |            |      |       |           |       |
|-----|----------------|---------------------------------------------------------------------|------------|------|-------|-----------|-------|
| A02 | WP_011799332.1 | phosphate signaling complex protein PhoU<br>[Mycobacterium]         | ALLALQHPV  | 0,03 | 0,667 | ALLADKFPV | nsp14 |
| A02 | WP_010950533.1 | SpoII E family protein phosphatase<br>[Mycobacterium]               | ALLAASVPV  | 0,04 | 0,667 | ALLADKFPV | nsp14 |
| A02 | WP_003418021.1 | chaperonin GroEL [Mycobacterium]                                    | ALLASATPV  | 0,06 | 0,667 | ALLADKFPV | nsp14 |
| A02 | WP_003419701.1 | ABC transporter permease<br>[Mycobacterium]                         | AVLAHAFPV  | 0,12 | 0,667 | ALLADKFPV | nsp14 |
| A02 | WP_003401260.1 | acyltransferase [Mycobacterium]                                     | AALAMVFPV  | 0,2  | 0,667 | ALLADKFPV | nsp14 |
| A02 | WP_010950697.1 | NAD-dependent malic enzyme<br>[Mycobacterium]                       | ALLATGSPV  | 0,3  | 0,667 | ALLADKFPV | nsp14 |
| B58 | WP_003400151.1 | thioredoxin-disulfide reductase<br>[Mycobacterium]                  | TTLPVTGVF  | 0,4  | 0,667 | TTLPVNVAF | nsp15 |
| B58 | WP_011799375.1 | polyketide synthase Pks13<br>[Mycobacterium]                        | VTLSVAVAF  | 0,4  | 0,667 | TTLPVNVAF | nsp15 |
| A03 | WP_011799327.1 | UPF0182 family protein [Mycobacterium]                              | KVQRMLLAK  | 0,17 | 0,778 | KMQRMLLEK | nsp16 |
| A02 | WP_010950818.1 | phosphoserine phosphatase SerB<br>[Mycobacterium]                   | TLAGLPATV  | 0,3  | 0,667 | TLIGDCATV | nsp16 |
| A02 | WP_003900824.1 | dihydroxy-acid dehydratase<br>[Mycobacterium]                       | LLHGDCLTV  | 0,5  | 0,667 | TLIGDCATV | nsp16 |
| A02 | WP_003406937.1 | DUF3817 domain-containing protein<br>[Mycobacterium]                | LLLTLNLAV  | 0,08 | 0,667 | YLNTLTLAV | nsp16 |
| A02 | WP_071854213.1 | thiol reductant ABC exporter subunit CydD<br>[Mycobacterium]        | YLPTLLLAA  | 0,25 | 0,667 | YLNTLTLAV | nsp16 |
| A02 | WP_003409281.1 | HlyC/CorC family transporter<br>[Mycobacterium]                     | LLHTLSLAV  | 0,4  | 0,667 | YLNTLTLAV | nsp16 |
| A02 | WP_003401670.1 | glucose-1-phosphate thymidyltransferase<br>RfbA [Mycobacterium]     | YLNQGR LAV | 0,5  | 0,667 | YLNTLTLAV | nsp16 |
| B44 | WP_003414292.1 | type III-A CRISPR-associated RAMP<br>protein Csm3 [Mycobacterium]   | IEITGTLTV  | 0,2  | 0,667 | SEETGTLIV | orf4  |
| B44 | WP_003407194.1 | HNH endonuclease [Mycobacterium]                                    | SEWRATLIV  | 0,5  | 0,667 | SEETGTLIV | orf4  |
| B44 | WP_003416051.1 | HNH endonuclease [Mycobacterium]                                    | SEWRATLIV  | 0,5  | 0,667 | SEETGTLIV | orf4  |
| A24 | WP_003409492.1 | DUF4389 domain-containing protein<br>[Mycobacterium]                | RYPIGLYNL  | 0,06 | 0,667 | RYRIGNYKL | orf5  |
| A02 | WP_003399839.1 | type VII secretion system ESX-1 adaptor<br>EspG1 [Mycobacterium]    | HLVDFPVTL  | 0,4  | 0,778 | HLVDFQVTI | orf6  |
| A02 | WP_003414861.1 | phthiocerol dimycocerosate RND<br>transporter MmpL7 [Mycobacterium] | SLVDSQVTV  | 0,2  | 0,667 | HLVDFQVTI | orf6  |
| A02 | WP_011799123.1 | arylsulfatase AtsA [Mycobacterium]                                  | KLFCRMAEV  | 0,03 | 0,667 | KLFIRQEEV | orf7a |
| A02 | WP_010950867.1 | arylsulfatase AtsB [Mycobacterium]                                  | RLFARQMEV  | 0,09 | 0,667 | KLFIRQEEV | orf7a |
| A02 | WP_003403680.1 | 30S ribosomal protein S5 [Mycobacterium]                            | KLLQRPEEV  | 0,5  | 0,667 | KLFIRQEEV | orf7a |

|     |                |                                                                             |            |      |       |           |      |
|-----|----------------|-----------------------------------------------------------------------------|------------|------|-------|-----------|------|
| A02 | WP_003900222.1 | alpha-keto acid decarboxylase family protein [Mycobacterium]                | YLLDRLAEL  | 0,01 | 0,667 | LLLDRLNQL | orf9 |
| A02 | WP_003413979.1 | TerC/Alx family metal homeostasis membrane protein [Mycobacterium]          | GLLDRLVYL  | 0,03 | 0,667 | LLLDRLNQL | orf9 |
| A02 | WP_003899091.1 | epoxide hydrolase EphB [Mycobacterium]                                      | LLLDFLGGL  | 0,1  | 0,667 | LLLDRLNQL | orf9 |
| A02 | WP_003402126.1 | thiazole synthase [Mycobacterium]                                           | GLLDLLNRL  | 0,12 | 0,667 | LLLDRLNQL | orf9 |
| A02 | WP_003401905.1 | ATP-dependent chaperone ClpB [Mycobacterium]                                | RLLDRLPQA  | 0,25 | 0,667 | LLLDRLNQL | orf9 |
| A02 | WP_003406680.1 | ATP synthase subunit I [Mycobacterium]                                      | LLLGLLNAL  | 0,25 | 0,667 | LLLDRLNQL | orf9 |
| A02 | WP_003417269.1 | succinate dehydrogenase hydrophobic membrane anchor subunit [Mycobacterium] | LLLLWLAQL  | 0,4  | 0,667 | LLLDRLNQL | orf9 |
| A02 | WP_011799223.1 | NAD(P)/FAD-dependent oxidoreductase [Mycobacterium]                         | FIAWLIWLV  | 0,01 | 0,667 | FIAGLIAIV | sg   |
| A02 | WP_003404792.1 | phosphate ABC transporter permease subunit PstC [Mycobacterium]             | FIAHHIAPV  | 0,01 | 0,667 | FIAGLIAIV | sg   |
| A02 | WP_003417126.1 | 5-(carboxyamino)imidazole ribonucleotide synthase [Mycobacterium]           | FIAPLVAMV  | 0,06 | 0,667 | FIAGLIAIV | sg   |
| A02 | WP_010950360.1 | AI-2E family transporter [Mycobacterium]                                    | FIAGLPHLV  | 0,07 | 0,667 | FIAGLIAIV | sg   |
| A02 | WP_003417121.1 | carbonic anhydrase [Mycobacterium]                                          | IIAGVIAAV  | 0,25 | 0,667 | FIAGLIAIV | sg   |
| A02 | WP_003414049.1 | ribonuclease J [Mycobacterium]                                              | RLDDIEALV  | 0,1  | 0,667 | RLDKVEAEV | sg   |
| A02 | WP_010950704.1 | non-ribosomal peptide synthetase [Mycobacterium]                            | RLDAVLA AV | 0,12 | 0,667 | RLDKVEAEV | sg   |
| A02 | WP_003399801.1 | PHP domain-containing protein [Mycobacterium]                               | RLDIVVASV  | 0,5  | 0,667 | RLDKVEAEV | sg   |
| A02 | WP_003418013.1 | sigma-70 family RNA polymerase sigma factor [Mycobacterium]                 | RLDAVVAEA  | 0,5  | 0,667 | RLDKVEAEV | sg   |
| A02 | WP_003400124.1 | NUDIX hydrolase [Mycobacterium]                                             | RLAEVADEL  | 0,5  | 0,667 | RLNEVAKNL | sg   |
| A02 | WP_010950939.1 | arabinoxyltransferase EmbB [Mycobacterium]                                  | ALGSLVTYV  | 0,09 | 0,667 | RLQSLQTYV | sg   |
| A02 | WP_003412516.1 | glutamate-5-semialdehyde dehydrogenase [Mycobacterium]                      | RLASLPTTV  | 0,25 | 0,667 | RLQSLQTYV | sg   |
| A01 | WP_003898438.1 | glucose-6-phosphate dehydrogenase (coenzyme-F420) [Mycobacterium]           | RVDFDGDYY  | 0,08 | 0,667 | RVDFCGKGY | sg   |

Supplementary Table 2. Similar BCG-Pasteur B cell epitopes and SARS-CoV-2 B cell epitopes

| BCG PROTEIN ID | BCG PROTEIN NAME                                                                 | BCG PEPTIDE | IDENTITY % | SARS-CoV-2 PEPTIDE | SARS-CoV-2 PROTEIN |
|----------------|----------------------------------------------------------------------------------|-------------|------------|--------------------|--------------------|
| WP_003400657.1 | winged helix-turn-helix transcriptional regulator [Mycobacterium]                | DVGLESSN    | 0,625      | DVNLHSSR           | nsp12              |
| WP_003402848.1 | cytochrome c biogenesis protein [Mycobacterium]                                  | DGTLSSR     | 0,625      | DVNLHSSR           | nsp12              |
| WP_003405138.1 | hypothetical protein [Mycobacterium]                                             | DVRLGSR     | 0,625      | DVNLHSSR           | nsp12              |
| WP_003407587.1 | methylmalonyl-CoA mutase [Mycobacterium]                                         | GVPLHSER    | 0,625      | DVNLHSSR           | nsp12              |
| WP_003410763.1 | RNA helicase [Mycobacterium]                                                     | DPELESSR    | 0,625      | DVNLHSSR           | nsp12              |
| WP_003413852.1 | N-acetyltransferase [Mycobacterium]                                              | DANLSSAR    | 0,625      | DVNLHSSR           | nsp12              |
| WP_003414837.1 | phthiocerol type I polyketide synthase PpsC [Mycobacterium tuberculosis complex] | VVNLDSGG    | 0,625      | DVNLHSSR           | nsp12              |
| WP_003898437.1 | MBL fold metallo-hydrolase [Mycobacterium]                                       | DVALRSWR    | 0,625      | DVNLHSSR           | nsp12              |
| WP_003901219.1 | phenylalanine--tRNA ligase subunit alpha [Mycobacterium]                         | DVTLPSTR    | 0,625      | DVNLHSSR           | nsp12              |
| WP_011799224.1 | NAD(P)H-binding protein [Mycobacterium]                                          | DGNLASIR    | 0,625      | DVNLHSSR           | nsp12              |
| WP_010950852.1 | sensor histidine kinase [Mycobacterium tuberculosis]                             | RVKN        | 1          | RVKN               | orf4               |
| WP_010950950.1 | type VII secretion system ESX-1 AAA family ATPase EccA1 [Mycobacterium]          | RVKN        | 1          | RVKN               | orf4               |
| WP_003400000.1 | type VII secretion system ESX-1 subunit EccE1 [Mycobacterium]                    | RVGN        | 0,75       | RVKN               | orf4               |
| WP_003400344.1 | cell division protein CrgA [Mycobacterium]                                       | RKKN        | 0,75       | RVKN               | orf4               |
| WP_003400514.1 | DUF2029 domain-containing protein [Mycobacterium]                                | RVAN        | 0,75       | RVKN               | orf4               |
| WP_003400665.1 | class I SAM-dependent methyltransferase [Mycobacterium]                          | RVKG        | 0,75       | RVKN               | orf4               |
| WP_003400974.1 | aldehyde dehydrogenase family protein [Mycobacterium]                            | RVKA        | 0,75       | RVKN               | orf4               |
| WP_003401230.1 | hypothetical protein [Mycobacterium]                                             | RFKN        | 0,75       | RVKN               | orf4               |
| WP_003401858.1 | hypothetical protein [Mycobacterium]                                             | RVRN        | 0,75       | RVKN               | orf4               |
| WP_003401912.1 | LuxR family transcriptional regulator [Mycobacterium]                            | RVAN        | 0,75       | RVKN               | orf4               |
| WP_003401912.1 | LuxR family transcriptional regulator [Mycobacterium]                            | RVDN        | 0,75       | RVKN               | orf4               |
| WP_003402272.1 | membrane protein [Mycobacterium]                                                 | RVSN        | 0,75       | RVKN               | orf4               |
| WP_003402316.1 | isocitrate lyase [Mycobacterium]                                                 | RTKN        | 0,75       | RVKN               | orf4               |
| WP_003402886.1 | DUF2064 domain-containing protein [Mycobacterium]                                | RVKT        | 0,75       | RVKN               | orf4               |
| WP_003403453.1 | 30S ribosomal protein S12 [Mycobacterium]                                        | RVKD        | 0,75       | RVKN               | orf4               |
| WP_003403453.1 | 30S ribosomal protein S12 [Mycobacterium]                                        | GVKN        | 0,75       | RVKN               | orf4               |
| WP_003403827.1 | helix-turn-helix domain-containing protein [Mycobacterium]                       | RVLN        | 0,75       | RVKN               | orf4               |
| WP_003404293.1 | sulfurtransferase [Mycobacterium tuberculosis complex]                           | NVKN        | 0,75       | RVKN               | orf4               |
| WP_003404631.1 | FAD-dependent oxidoreductase [Mycobacterium]                                     | RVRN        | 0,75       | RVKN               | orf4               |
| WP_003405183.1 | methionine--tRNA ligase [Mycobacterium]                                          | RVPN        | 0,75       | RVKN               | orf4               |
| WP_003405263.1 | ribose-phosphate diphosphokinase [Mycobacterium]                                 | RVPN        | 0,75       | RVKN               | orf4               |
| WP_003405328.1 | response regulator transcription factor [Mycobacterium]                          | RVWN        | 0,75       | RVKN               | orf4               |



|                |                                                                                                                                           |      |      |      |      |
|----------------|-------------------------------------------------------------------------------------------------------------------------------------------|------|------|------|------|
| WP_003406182.1 | PadR family transcriptional regulator [Mycobacterium]                                                                                     | RVKS | 0,75 | RVKN | orf4 |
| WP_003406196.1 | AMP-binding protein [Mycobacterium]                                                                                                       | RVKD | 0,75 | RVKN | orf4 |
| WP_003406257.1 | RNA polymerase sigma factor SigE [Mycobacterium]                                                                                          | RVGN | 0,75 | RVKN | orf4 |
| WP_003406553.1 | response regulator transcription factor EmbR [Mycobacterium]                                                                              | RVKT | 0,75 | RVKN | orf4 |
| WP_003406598.1 | oxidoreductase [Mycobacterium]                                                                                                            | RDKN | 0,75 | RVKN | orf4 |
| WP_003406602.1 | ABC transporter ATP-binding protein [Mycobacterium]                                                                                       | RVKT | 0,75 | RVKN | orf4 |
| WP_003406621.1 | adenylyl-sulfate kinase [Mycobacterium]                                                                                                   | RPKN | 0,75 | RVKN | orf4 |
| WP_003406897.1 | alpha-1,4-glucan:maltose-1-phosphate maltosyltransferase [Mycobacterium]                                                                  | RVKP | 0,75 | RVKN | orf4 |
| WP_003407308.1 | bifunctional diaminohydroxyphosphoribosylaminopyrimidine deaminase/5-amino-6-(5-phosphoribosylamino)uracil reductase RibD [Mycobacterium] | RVLN | 0,75 | RVKN | orf4 |
| WP_003408165.1 | ornithine carbamoyltransferase [Mycobacterium]                                                                                            | RVKP | 0,75 | RVKN | orf4 |
| WP_003409271.1 | malate synthase G [Mycobacterium]                                                                                                         | RVLN | 0,75 | RVKN | orf4 |
| WP_003409667.1 | serine hydrolase [Mycobacterium]                                                                                                          | RVGN | 0,75 | RVKN | orf4 |
| WP_003410042.1 | NAD(P)/FAD-dependent oxidoreductase [Mycobacterium]                                                                                       | AVKN | 0,75 | RVKN | orf4 |
| WP_003410624.1 | 30S ribosomal protein S14 [Mycobacterium]                                                                                                 | IVKN | 0,75 | RVKN | orf4 |
| WP_003410735.1 | protein kinase [Mycobacterium tuberculosis complex]                                                                                       | DVKN | 0,75 | RVKN | orf4 |
| WP_003410775.1 | YafY family transcriptional regulator [Mycobacterium]                                                                                     | RDKN | 0,75 | RVKN | orf4 |
| WP_003411124.1 | type II toxin-antitoxin system RelE/ParE family toxin [Mycobacterium]                                                                     | RVHN | 0,75 | RVKN | orf4 |
| WP_003412005.1 | ThiF family adenylyltransferase [Mycobacterium]                                                                                           | RVKE | 0,75 | RVKN | orf4 |
| WP_003412005.1 | ThiF family adenylyltransferase [Mycobacterium]                                                                                           | RVKR | 0,75 | RVKN | orf4 |
| WP_003412298.1 | nitrite/sulfite reductase [Mycobacterium]                                                                                                 | RLKN | 0,75 | RVKN | orf4 |
| WP_003412557.1 | HAMP domain-containing protein [Mycobacterium]                                                                                            | RHKN | 0,75 | RVKN | orf4 |
| WP_003412717.1 | wax ester/triacylglycerol synthase family O-acyltransferase [Mycobacterium]                                                               | RVLN | 0,75 | RVKN | orf4 |
| WP_003413373.1 | lipoprotein [Mycobacterium]                                                                                                               | RVNN | 0,75 | RVKN | orf4 |
| WP_003414006.1 | intein-containing recombinase RecA [Mycobacterium]                                                                                        | RVKV | 0,75 | RVKN | orf4 |
| WP_003414006.1 | intein-containing recombinase RecA [Mycobacterium]                                                                                        | VVKN | 0,75 | RVKN | orf4 |
| WP_003414919.1 | rhamnosyl O-methyltransferase [Mycobacterium]                                                                                             | RLKN | 0,75 | RVKN | orf4 |
| WP_003415170.1 | PH domain-containing protein [Mycobacterium]                                                                                              | RVPN | 0,75 | RVKN | orf4 |
| WP_003416369.1 | two-component system response regulator DevR [Bacteria]                                                                                   | TVKN | 0,75 | RVKN | orf4 |
| WP_003416607.1 | flavin monoamine oxidase family protein [Mycobacterium]                                                                                   | DVKN | 0,75 | RVKN | orf4 |
| WP_003417288.1 | class I SAM-dependent methyltransferase [Mycobacterium]                                                                                   | RVKP | 0,75 | RVKN | orf4 |
| WP_003419304.1 | steroid C26-monooxygenase Cyp125 [Mycobacterium]                                                                                          | RFKN | 0,75 | RVKN | orf4 |

|                |                                                                             |      |      |      |      |
|----------------|-----------------------------------------------------------------------------|------|------|------|------|
| WP_003420624.1 | nucleoside diphosphate kinase regulator [Mycobacterium]                     | EVKN | 0,75 | RVKN | orf4 |
| WP_003898475.1 | DUF2993 domain-containing protein [Mycobacterium]                           | RLKN | 0,75 | RVKN | orf4 |
| WP_003898507.1 | hypothetical protein [Mycobacterium]                                        | REKN | 0,75 | RVKN | orf4 |
| WP_003898557.1 | mycofactocin biosynthesis FMN-dependent deaminase MftD [Mycobacterium]      | RVPN | 0,75 | RVKN | orf4 |
| WP_003898651.1 | phosphate ABC transporter permease PstA [Mycobacterium]                     | RIKN | 0,75 | RVKN | orf4 |
| WP_003898655.1 | ATP-dependent DNA ligase [Mycobacterium]                                    | RLKN | 0,75 | RVKN | orf4 |
| WP_003898889.1 | iron-regulated aconitate hydratase Acn [Mycobacterium]                      | RVSN | 0,75 | RVKN | orf4 |
| WP_003898889.1 | iron-regulated aconitate hydratase Acn [Mycobacterium]                      | RVKS | 0,75 | RVKN | orf4 |
| WP_003898998.1 | protein kinase [Mycobacterium]                                              | RVLN | 0,75 | RVKN | orf4 |
| WP_003899482.1 | transposase [Mycobacterium]                                                 | TVKN | 0,75 | RVKN | orf4 |
| WP_003899505.1 | translation initiation factor IF-2 [Mycobacterium]                          | RVGN | 0,75 | RVKN | orf4 |
| WP_003899528.1 | 30S ribosomal protein S2 [Mycobacterium]                                    | REKN | 0,75 | RVKN | orf4 |
| WP_003899536.1 | amidohydrolase family protein [Mycobacterium]                               | RVLN | 0,75 | RVKN | orf4 |
| WP_003899637.1 | metallophosphoesterase [Mycobacterium]                                      | RLKN | 0,75 | RVKN | orf4 |
| WP_003899711.1 | acyltransferase PapA1 [Mycobacterium]                                       | RVGN | 0,75 | RVKN | orf4 |
| WP_003900225.1 | MFS transporter [Mycobacterium]                                             | EVKN | 0,75 | RVKN | orf4 |
| WP_003900449.1 | type II toxin-antitoxin system RelE/ParE family toxin [Mycobacterium]       | RHKN | 0,75 | RVKN | orf4 |
| WP_003900487.1 | acyl-CoA carboxylase subunit beta [Mycobacterium]                           | RHKN | 0,75 | RVKN | orf4 |
| WP_003900516.1 | elongation factor 4 [Mycobacterium]                                         | RVTN | 0,75 | RVKN | orf4 |
| WP_003900556.1 | Si-specific NAD(P)(+) transhydrogenase [Mycobacterium]                      | RVKD | 0,75 | RVKN | orf4 |
| WP_003900633.1 | GTP 3',8-cyclase MoaA [Mycobacterium]                                       | RVKD | 0,75 | RVKN | orf4 |
| WP_003900842.1 | PecA family PE domain-processing aspartic protease [Mycobacterium]          | RVEN | 0,75 | RVKN | orf4 |
| WP_003900945.1 | exopolyphosphatase Ppx1 [Mycobacterium]                                     | RVKR | 0,75 | RVKN | orf4 |
| WP_003901420.1 | type I polyketide synthase [Mycobacterium]                                  | RVKL | 0,75 | RVKN | orf4 |
| WP_003901420.1 | type I polyketide synthase [Mycobacterium]                                  | RVKK | 0,75 | RVKN | orf4 |
| WP_003909568.1 | cobalt-precorrin-6A reductase [Mycobacterium]                               | RVPN | 0,75 | RVKN | orf4 |
| WP_003909645.1 | hypothetical protein [Mycobacterium]                                        | RRKN | 0,75 | RVKN | orf4 |
| WP_003910893.1 | Pup--protein ligase [Mycobacterium tuberculosis complex]                    | RVKR | 0,75 | RVKN | orf4 |
| WP_010950580.1 | biotin carboxylase [Mycobacterium]                                          | RVLN | 0,75 | RVKN | orf4 |
| WP_010950586.1 | hypothetical protein [Mycobacterium]                                        | RVGN | 0,75 | RVKN | orf4 |
| WP_010950675.1 | DUF4191 domain-containing protein [Mycobacterium]                           | RVKP | 0,75 | RVKN | orf4 |
| WP_010950826.1 | ferredoxin--NADP(+) reductase FprA [Mycobacterium]                          | RVKL | 0,75 | RVKN | orf4 |
| WP_010950934.1 | wax ester/triacylglycerol synthase family O-acyltransferase [Mycobacterium] | RVKA | 0,75 | RVKN | orf4 |

|                |                                                                                    |          |       |          |      |
|----------------|------------------------------------------------------------------------------------|----------|-------|----------|------|
| WP_010950955.1 | type VII secretion system ESX-2 subunit EccE2 [Mycobacterium]                      | RRKN     | 0,75  | RVKN     | orf4 |
| WP_011799147.1 | sensor histidine kinase KdpD [Mycobacterium]                                       | RVKV     | 0,75  | RVKN     | orf4 |
| WP_011799175.1 | fatty acid desaturase [Mycobacterium]                                              | RVFN     | 0,75  | RVKN     | orf4 |
| WP_011799190.1 | RND transporter MmpL12 [Mycobacterium]                                             | RVKG     | 0,75  | RVKN     | orf4 |
| WP_011799239.1 | DEAD/DEAH box helicase [Mycobacterium]                                             | RVDN     | 0,75  | RVKN     | orf4 |
| WP_011799254.1 | tRNA-dependent cyclodipeptide synthase [Mycobacterium]                             | AVKN     | 0,75  | RVKN     | orf4 |
| WP_011799261.1 | non-ribosomal peptide synthetase [Mycobacterium]                                   | RVKI     | 0,75  | RVKN     | orf4 |
| WP_011799262.1 | Rv2407 family type 3 sulfatase [Mycobacterium]                                     | RVKD     | 0,75  | RVKN     | orf4 |
| WP_011799328.1 | hypothetical protein [Mycobacterium]                                               | RVKP     | 0,75  | RVKN     | orf4 |
| WP_011799364.1 | type I DNA topoisomerase [Mycobacterium]                                           | KVKN     | 0,75  | RVKN     | orf4 |
| WP_011799375.1 | polyketide synthase Pks13 [Mycobacterium]                                          | RIKN     | 0,75  | RVKN     | orf4 |
| WP_011799379.1 | type I polyketide synthase [Mycobacterium]                                         | RVLN     | 0,75  | RVKN     | orf4 |
| WP_015385278.1 | CoA transferase [Mycobacterium]                                                    | RPKN     | 0,75  | RVKN     | orf4 |
| WP_015385278.1 | CoA transferase [Mycobacterium]                                                    | RVAN     | 0,75  | RVKN     | orf4 |
| WP_031652105.1 | DNA topoisomerase (ATP-hydrolyzing) subunit B [Mycobacterium]                      | RTKN     | 0,75  | RVKN     | orf4 |
| WP_003402308.1 | helix-turn-helix domain-containing protein [Mycobacterium]                         | FTSAESRT | 0,625 | ITVATSRT | orf5 |
| WP_003404801.1 | MBL fold metallo-hydrolase [Mycobacterium]                                         | QTVRTSGT | 0,625 | ITVATSRT | orf5 |
| WP_003406283.1 | DUF1003 domain-containing protein [Mycobacterium]                                  | YTPRTSRT | 0,625 | ITVATSRT | orf5 |
| WP_003408781.1 | DUF4407 domain-containing protein [Mycobacterium]                                  | ETEASRT  | 0,625 | ITVATSRT | orf5 |
| WP_003408797.1 | type VII secretion system ESX-5 subunit EccB5 [Mycobacterium]                      | DTVATSSS | 0,625 | ITVATSRT | orf5 |
| WP_003410152.1 | two-component system sensor histidine kinase DosT [Mycobacterium]                  | MTVAVSGT | 0,625 | ITVATSRT | orf5 |
| WP_003413196.1 | endolytic transglycosylase MltG [Mycobacterium]                                    | REVATSDT | 0,625 | ITVATSRT | orf5 |
| WP_003414040.1 | DNA translocase FtsK [Mycobacterium]                                               | KTVARSGT | 0,625 | ITVATSRT | orf5 |
| WP_003414750.1 | DEAD/DEAH box helicase [Mycobacterium]                                             | FTAATSRF | 0,625 | ITVATSRT | orf5 |
| WP_003419740.1 | ArsA family ATPase [Mycobacterium]                                                 | QTVATSLA | 0,625 | ITVATSRT | orf5 |
| WP_003898768.1 | 2,3,4,5-tetrahydropyridine-2,6-dicarboxylate N-succinyltransferase [Mycobacterium] | GTSATSRL | 0,625 | ITVATSRT | orf5 |
| WP_003899824.1 | maltokinase [Mycobacterium]                                                        | IGVADDRT | 0,625 | ITVATSRT | orf5 |
| WP_003904723.1 | hypothetical protein [Mycobacterium]                                               | DTVPTSRY | 0,625 | ITVATSRT | orf5 |
| WP_010950416.1 | hypothetical protein [Mycobacterium]                                               | ITVARSVP | 0,625 | ITVATSRT | orf5 |
| WP_010950499.1 | nitrate reductase subunit alpha [Mycobacterium]                                    | RTVDTPRT | 0,625 | ITVATSRT | orf5 |
| WP_011799243.1 | DUF5631 domain-containing protein [Mycobacterium tuberculosis]                     | PTVATATT | 0,625 | ITVATSRT | orf5 |
| WP_011799253.1 | cytochrome P450 [Mycobacterium]                                                    | IPVATSMW | 0,625 | ITVATSRT | orf5 |

|                |                                                                              |         |             |        |      |
|----------------|------------------------------------------------------------------------------|---------|-------------|--------|------|
| WP_003420539.1 | phosphotransferase family protein [Mycobacterium]                            | LLPAAD  | 1           | LLPAAD | orf9 |
| WP_003399828.1 | type VII secretion system ESX-1 associated protein EspE [Mycobacterium]      | LTTLPK  | 0,833333333 | GTTLPK | orf9 |
| WP_003400391.1 | helix-turn-helix transcriptional regulator [Mycobacterium]                   | LLVAAD  | 0,833333333 | LLPAAD | orf9 |
| WP_003401347.1 | PPE family protein [Mycobacterium]                                           | LLPAAL  | 0,833333333 | LLPAAD | orf9 |
| WP_003402129.1 | DUF2752 domain-containing protein [Terrabacteria group]                      | LLAAAD  | 0,833333333 | LLPAAD | orf9 |
| WP_003410786.1 | PE family protein [Mycobacterium]                                            | LAPAAD  | 0,833333333 | LLPAAD | orf9 |
| WP_003414086.1 | PE domain-containing protein [Mycobacterium tuberculosis complex]            | LLPAAE  | 0,833333333 | LLPAAD | orf9 |
| WP_003416804.1 | zinc-dependent metalloprotease [Mycobacterium]                               | LLPATD  | 0,833333333 | LLPAAD | orf9 |
| WP_003417095.1 | class I SAM-dependent methyltransferase [Mycobacterium]                      | LLDAAD  | 0,833333333 | LLPAAD | orf9 |
| WP_003911263.1 | antitoxin VapB7 [Mycobacterium tuberculosis complex]                         | LLDAAD  | 0,833333333 | LLPAAD | orf9 |
| WP_010950351.1 | PE-PPE domain-containing protein [Mycobacterium]                             | LLPTAD  | 0,833333333 | LLPAAD | orf9 |
| WP_003400134.1 | murein biosynthesis integral membrane protein MurJ [Mycobacterium]           | GTTDGG  | 0,666666667 | GTTLPK | orf9 |
| WP_003400364.1 | FtsW/RodA/SpoVE family cell cycle protein [Mycobacterium]                    | GMTLPR  | 0,666666667 | GTTLPK | orf9 |
| WP_003401003.1 | PE-PPE domain-containing protein [Mycobacterium]                             | VTTLPL  | 0,666666667 | GTTLPK | orf9 |
| WP_003401084.1 | virulence factor Mce family protein [Mycobacterium]                          | ASTLPK  | 0,666666667 | GTTLPK | orf9 |
| WP_003401560.1 | toxin-antitoxin system toxin [Mycobacterium]                                 | GTLLEPE | 0,666666667 | GTTLPK | orf9 |
| WP_003401751.1 | hypothetical protein [Mycobacterium]                                         | GTTAPT  | 0,666666667 | GTTLPK | orf9 |
| WP_003402339.1 | heparin-binding hemagglutinin HbhA [Mycobacterium]                           | GIELPK  | 0,666666667 | GTTLPK | orf9 |
| WP_003402688.1 | hypothetical protein [Mycobacterium]                                         | ETTLPA  | 0,666666667 | GTTLPK | orf9 |
| WP_003403363.1 | ABC transporter ATP-binding protein [Mycobacterium]                          | LHTLPK  | 0,666666667 | GTTLPK | orf9 |
| WP_003403453.1 | 30S ribosomal protein S12 [Mycobacterium]                                    | YTTTPK  | 0,666666667 | GTTLPK | orf9 |
| WP_003403870.1 | HAMP domain-containing histidine kinase [Mycobacterium tuberculosis complex] | PTTLPS  | 0,666666667 | GTTLPK | orf9 |
| WP_003404278.1 | DUF1416 domain-containing protein [Mycobacterium]                            | GLTLPA  | 0,666666667 | GTTLPK | orf9 |
| WP_003404316.1 | LCP family protein [Mycobacterium]                                           | TTTSPK  | 0,666666667 | GTTLPK | orf9 |
| WP_003404689.1 | HAMP domain-containing histidine kinase [Mycobacterium]                      | DITLPK  | 0,666666667 | GTTLPK | orf9 |
| WP_003404761.1 | transposase [Mycobacterium]                                                  | GTTAPS  | 0,666666667 | GTTLPK | orf9 |
| WP_003405123.1 | two-component system sensor histidine kinase MprB [Mycobacterium]            | GQTLPV  | 0,666666667 | GTTLPK | orf9 |
| WP_003405138.1 | hypothetical protein [Mycobacterium]                                         | ATTLPD  | 0,666666667 | GTTLPK | orf9 |
| WP_003405724.1 | acetyl-CoA C-acetyltransferase [Mycobacterium]                               | GTTYEK  | 0,666666667 | GTTLPK | orf9 |
| WP_003405897.1 | HNH endonuclease [Mycobacterium]                                             | GLTLGK  | 0,666666667 | GTTLPK | orf9 |
| WP_003406243.1 | DivIVA domain-containing protein [Mycobacterium]                             | ATTLPA  | 0,666666667 | GTTLPK | orf9 |
| WP_003408063.1 | DNA polymerase I [Mycobacterium]                                             | GTHLPH  | 0,666666667 | GTTLPK | orf9 |

|                |                                                                             |        |             |        |      |
|----------------|-----------------------------------------------------------------------------|--------|-------------|--------|------|
| WP_003408080.1 | mannosyltransferase [Mycobacterium]                                         | GTYGPK | 0,666666667 | GTTLPK | orf9 |
| WP_003408859.1 | type VII secretion system ESX-5 subunit EccE5 [Mycobacterium]               | GTTLGA | 0,666666667 | GTTLPK | orf9 |
| WP_003408859.1 | type VII secretion system ESX-5 subunit EccE5 [Mycobacterium]               | DTRLPK | 0,666666667 | GTTLPK | orf9 |
| WP_003409685.1 | YqjF family protein [Mycobacterium]                                         | GTALPI | 0,666666667 | GTTLPK | orf9 |
| WP_003410677.1 | class A beta-lactamase BlaA [Mycobacterium]                                 | STTLPA | 0,666666667 | GTTLPK | orf9 |
| WP_003410763.1 | RNA helicase [Mycobacterium]                                                | SMTLPK | 0,666666667 | GTTLPK | orf9 |
| WP_003411425.1 | DUF3043 domain-containing protein [Mycobacterium]                           | QTTGPK | 0,666666667 | GTTLPK | orf9 |
| WP_003411486.1 | alpha/beta hydrolase [Mycobacterium]                                        | FQTLPK | 0,666666667 | GTTLPK | orf9 |
| WP_003412309.1 | gamma-glutamyltransferase family protein [Mycobacterium]                    | GTPAPK | 0,666666667 | GTTLPK | orf9 |
| WP_003412373.1 | ComEA family DNA-binding protein [Mycobacterium]                            | ATTGPK | 0,666666667 | GTTLPK | orf9 |
| WP_003412516.1 | glutamate-5-semialdehyde dehydrogenase [Mycobacterium]                      | GYTLPN | 0,666666667 | GTTLPK | orf9 |
| WP_003412557.1 | HAMP domain-containing protein [Mycobacterium]                              | GTLLQ  | 0,666666667 | GTTLPK | orf9 |
| WP_003412771.1 | acyl-CoA dehydrogenase [Mycobacterium]                                      | GGILPK | 0,666666667 | GTTLPK | orf9 |
| WP_003412938.1 | L,D-transpeptidase LdtMt2 [Mycobacterium]                                   | GGTLPG | 0,666666667 | GTTLPK | orf9 |
| WP_003413395.1 | 4-aminobutyrate--2-oxoglutarate transaminase [Mycobacterium]                | GTTEPD | 0,666666667 | GTTLPK | orf9 |
| WP_003413917.1 | APC family permease [Mycobacterium]                                         | HTLLPK | 0,666666667 | GTTLPK | orf9 |
| WP_003414061.1 | type II toxin-antitoxin system VapB family antitoxin [Mycobacterium]        | GTTTKK | 0,666666667 | GTTLPK | orf9 |
| WP_003414409.1 | hypothetical protein [Mycobacterium]                                        | GTSLRK | 0,666666667 | GTTLPK | orf9 |
| WP_003414748.1 | signal recognition particle protein [Mycobacterium]                         | GPTPPK | 0,666666667 | GTTLPK | orf9 |
| WP_003416079.1 | wax ester/triacylglycerol synthase family O-acyltransferase [Mycobacterium] | GTTSPK | 0,666666667 | GTTLPK | orf9 |
| WP_003416111.1 | maleylpyruvate isomerase family mycothiol-dependent enzyme [Mycobacterium]  | LTTLDK | 0,666666667 | GTTLPK | orf9 |
| WP_003416124.1 | hypothetical protein [Mycobacterium]                                        | GTTTPT | 0,666666667 | GTTLPK | orf9 |
| WP_003416381.1 | PPE family protein [Mycobacterium tuberculosis complex]                     | LTTLPG | 0,666666667 | GTTLPK | orf9 |
| WP_003417051.1 | hypothetical protein [Mycobacterium]                                        | GHTLRK | 0,666666667 | GTTLPK | orf9 |
| WP_003417413.1 | sigma-70 family RNA polymerase sigma factor [Mycobacterium]                 | GTWLPE | 0,666666667 | GTTLPK | orf9 |
| WP_003418324.1 | type VII secretion-associated protein [Mycobacterium]                       | GETLPG | 0,666666667 | GTTLPK | orf9 |
| WP_003419226.1 | PPE family protein [Mycobacterium]                                          | MTTLPG | 0,666666667 | GTTLPK | orf9 |
| WP_003419487.1 | DNA repair protein RadA [Mycobacterium]                                     | GTTLAT | 0,666666667 | GTTLPK | orf9 |
| WP_003420801.1 | exported repetitive protein [Mycobacterium]                                 | GTTLAP | 0,666666667 | GTTLPK | orf9 |
| WP_003420837.1 | MBL fold metallo-hydrolase [Mycobacterium]                                  | GTTLNS | 0,666666667 | GTTLPK | orf9 |
| WP_003898475.1 | DUF2993 domain-containing protein [Mycobacterium]                           | GFSLPK | 0,666666667 | GTTLPK | orf9 |

|                |                                                                                                     |        |             |        |      |
|----------------|-----------------------------------------------------------------------------------------------------|--------|-------------|--------|------|
| WP_003899099.1 | hypothetical protein [Mycobacterium]                                                                | PTTTPK | 0,666666667 | GTTLPK | orf9 |
| WP_003899212.1 | cytochrome bc complex cytochrome b subunit [Mycobacterium]                                          | GAPLPK | 0,666666667 | GTTLPK | orf9 |
| WP_003899377.1 | DUF2189 domain-containing protein [Mycobacterium]                                                   | GYLPP  | 0,666666667 | GTTLPK | orf9 |
| WP_003899402.1 | alpha/beta hydrolase [Mycobacterium]                                                                | GQGLPK | 0,666666667 | GTTLPK | orf9 |
| WP_003899738.1 | type VII secretion system ESX-1 FtsK/SpoIIIE family ATPase EccCa1 [Mycobacterium]                   | GTILDK | 0,666666667 | GTTLPK | orf9 |
| WP_003900145.1 | glutamate--cysteine ligase [Mycobacterium]                                                          | GETLPT | 0,666666667 | GTTLPK | orf9 |
| WP_003900163.1 | bifunctional uroporphyrinogen-III C-methyltransferase/uroporphyrinogen-III synthase [Mycobacterium] | GTDLPP | 0,666666667 | GTTLPK | orf9 |
| WP_003900242.1 | hypothetical protein [Mycobacterium]                                                                | GTALPP | 0,666666667 | GTTLPK | orf9 |
| WP_003900533.1 | phosphatidylinositol mannoside acyltransferase [Mycobacterium]                                      | GLKLPK | 0,666666667 | GTTLPK | orf9 |
| WP_003900650.1 | phosphotransferase family protein [Mycobacterium]                                                   | VTTLPA | 0,666666667 | GTTLPK | orf9 |
| WP_003900963.1 | GDP-mannose-dependent alpha-mannosyltransferase [Mycobacterium]                                     | VTTLPL | 0,666666667 | GTTLPK | orf9 |
| WP_003901231.1 | cytochrome P450 [Mycobacterium]                                                                     | GTTLSD | 0,666666667 | GTTLPK | orf9 |
| WP_003901422.1 | type II toxin-antitoxin system VapB family antitoxin [Mycobacterium]                                | GTTGLK | 0,666666667 | GTTLPK | orf9 |
| WP_003904400.1 | cation-translocating P-type ATPase [Mycobacterium]                                                  | QTTKPK | 0,666666667 | GTTLPK | orf9 |
| WP_003908489.1 | molybdopterin oxidoreductase family protein [Mycobacterium]                                         | GPTLPD | 0,666666667 | GTTLPK | orf9 |
| WP_003909568.1 | cobalt-precorrin-6A reductase [Mycobacterium]                                                       | GTALPR | 0,666666667 | GTTLPK | orf9 |
| WP_003910308.1 | PE family protein [Mycobacterium tuberculosis complex]                                              | GTTGPD | 0,666666667 | GTTLPK | orf9 |
| WP_003910705.1 | hypothetical protein [Mycobacterium]                                                                | GTTGHK | 0,666666667 | GTTLPK | orf9 |
| WP_010950379.1 | DUF3060 domain-containing protein [Mycobacterium]                                                   | ATTLPP | 0,666666667 | GTTLPK | orf9 |
| WP_010950382.1 | maleylpyruvate isomerase family mycothiol-dependent enzyme [Mycobacterium]                          | GTPLPL | 0,666666667 | GTTLPK | orf9 |
| WP_010950571.1 | type I polyketide synthase [Mycobacterium tuberculosis]                                             | GLTLPS | 0,666666667 | GTTLPK | orf9 |
| WP_010950788.1 | multidrug efflux MFS transporter EfpA [Mycobacterium]                                               | GTTGPV | 0,666666667 | GTTLPK | orf9 |
| WP_010950801.1 | phthiocerol type I polyketide synthase PpsD [Mycobacterium]                                         | GTTFPT | 0,666666667 | GTTLPK | orf9 |
| WP_010950946.1 | NAD(P)/FAD-dependent oxidoreductase [Mycobacterium]                                                 | AGTLPK | 0,666666667 | GTTLPK | orf9 |
| WP_010950954.1 | type VII secretion system ESX-1 serine protease mycosin MycP1 [Mycobacterium]                       | PTTLPG | 0,666666667 | GTTLPK | orf9 |
| WP_011799079.1 | RDD family protein [Mycobacterium]                                                                  | PTTLPQ | 0,666666667 | GTTLPK | orf9 |
| WP_011799098.1 | peptidase [Mycobacterium]                                                                           | PTELPK | 0,666666667 | GTTLPK | orf9 |
| WP_011799126.1 | PE family protein [Mycobacterium tuberculosis]                                                      | GATLGK | 0,666666667 | GTTLPK | orf9 |

|                |                                                                             |        |             |        |      |
|----------------|-----------------------------------------------------------------------------|--------|-------------|--------|------|
| WP_011799136.1 | DNA-binding protein [Mycobacterium]                                         | GTALPW | 0,666666667 | GTTLPK | orf9 |
| WP_011799214.1 | PPE family protein [Mycobacterium tuberculosis]                             | GLTLPS | 0,666666667 | GTTLPK | orf9 |
| WP_011799214.1 | PPE family protein [Mycobacterium tuberculosis]                             | GLTLPS | 0,666666667 | GTTLPK | orf9 |
| WP_011799214.1 | PPE family protein [Mycobacterium tuberculosis]                             | GLTLPS | 0,666666667 | GTTLPK | orf9 |
| WP_011799214.1 | PPE family protein [Mycobacterium tuberculosis]                             | GFTLPQ | 0,666666667 | GTTLPK | orf9 |
| WP_011799214.1 | PPE family protein [Mycobacterium tuberculosis]                             | GFTLPQ | 0,666666667 | GTTLPK | orf9 |
| WP_011799214.1 | PPE family protein [Mycobacterium tuberculosis]                             | GFTLPQ | 0,666666667 | GTTLPK | orf9 |
| WP_011799214.1 | PPE family protein [Mycobacterium tuberculosis]                             | GFTLPQ | 0,666666667 | GTTLPK | orf9 |
| WP_011799214.1 | PPE family protein [Mycobacterium tuberculosis]                             | GFTLPQ | 0,666666667 | GTTLPK | orf9 |
| WP_011799214.1 | PPE family protein [Mycobacterium tuberculosis]                             | GFTLPQ | 0,666666667 | GTTLPK | orf9 |
| WP_011799214.1 | PPE family protein [Mycobacterium tuberculosis]                             | GFTLPQ | 0,666666667 | GTTLPK | orf9 |
| WP_011799240.1 | type I polyketide synthase [Mycobacterium tuberculosis]                     | GGTLPP | 0,666666667 | GTTLPK | orf9 |
| WP_011799327.1 | UPF0182 family protein [Mycobacterium]                                      | GTVKPK | 0,666666667 | GTTLPK | orf9 |
| WP_011799362.1 | type VII secretion system ESX-1 target EspA<br>[Mycobacterium tuberculosis] | GTTTKK | 0,666666667 | GTTLPK | orf9 |
| WP_087902221.1 | IS3-like element IS987 family transposase [Bacteria]                        | GTTRGK | 0,666666667 | GTTLPK | orf9 |
| WP_137054066.1 | PPE family protein [Mycobacterium tuberculosis]                             | GYTLPL | 0,666666667 | GTTLPK | orf9 |
| WP_137054066.1 | PPE family protein [Mycobacterium tuberculosis]                             | STTLPS | 0,666666667 | GTTLPK | orf9 |
| WP_162014417.1 | hypothetical protein [Mycobacterium tuberculosis]                           | GTTGPV | 0,666666667 | GTTLPK | orf9 |
| WP_162014417.1 | hypothetical protein [Mycobacterium tuberculosis]                           | GTTGGK | 0,666666667 | GTTLPK | orf9 |
| WP_003399839.1 | type VII secretion system ESX-1 adaptor EspG1<br>[Mycobacterium]            | LLPAGA | 0,666666667 | LLPAAD | orf9 |
| WP_003400028.1 | type VII secretion system ESX-2 associated protein EspG2<br>[Mycobacterium] | LLPRLD | 0,666666667 | LLPAAD | orf9 |
| WP_003400028.1 | type VII secretion system ESX-2 associated protein EspG2<br>[Mycobacterium] | RLPAGD | 0,666666667 | LLPAAD | orf9 |
| WP_003400120.1 | CCA tRNA nucleotidyltransferase [Mycobacterium]                             | LLTAAA | 0,666666667 | LLPAAD | orf9 |
| WP_003400126.1 | hypothetical protein [Mycobacterium tuberculosis complex]                   | YQPAAD | 0,666666667 | LLPAAD | orf9 |
| WP_003400126.1 | hypothetical protein [Mycobacterium tuberculosis complex]                   | LLSAAE | 0,666666667 | LLPAAD | orf9 |
| WP_003400126.1 | hypothetical protein [Mycobacterium tuberculosis complex]                   | LLPATA | 0,666666667 | LLPAAD | orf9 |
| WP_003400364.1 | FtsW/RodA/SpoVE family cell cycle protein<br>[Mycobacterium]                | LDPFAD | 0,666666667 | LLPAAD | orf9 |
| WP_003400514.1 | DUF2029 domain-containing protein [Mycobacterium]                           | LPLAAD | 0,666666667 | LLPAAD | orf9 |
| WP_003400629.1 | hypothetical protein [Mycobacterium]                                        | GAPAAD | 0,666666667 | LLPAAD | orf9 |
| WP_003400658.1 | NADH-quinone oxidoreductase subunit B family protein<br>[Mycobacterium]     | PLPAAI | 0,666666667 | LLPAAD | orf9 |
| WP_003400665.1 | class I SAM-dependent methyltransferase [Mycobacterium]                     | LLPGAC | 0,666666667 | LLPAAD | orf9 |
| WP_003400858.1 | oxalyl-CoA decarboxylase [Mycobacterium]                                    | LLPAPE | 0,666666667 | LLPAAD | orf9 |
| WP_003400858.1 | oxalyl-CoA decarboxylase [Mycobacterium]                                    | LLEAAA | 0,666666667 | LLPAAD | orf9 |

|                |                                                                               |        |             |        |      |
|----------------|-------------------------------------------------------------------------------|--------|-------------|--------|------|
| WP_003400949.1 | DUF427 domain-containing protein [Mycobacterium]                              | LEPSAD | 0,666666667 | LLPAAD | orf9 |
| WP_003401003.1 | PE-PPE domain-containing protein [Mycobacterium]                              | LLPTVD | 0,666666667 | LLPAAD | orf9 |
| WP_003401153.1 | hypothetical protein [Mycobacterium]                                          | QLPAAW | 0,666666667 | LLPAAD | orf9 |
| WP_003401224.1 | acyl dehydratase [Mycobacterium]                                              | PAPAAD | 0,666666667 | LLPAAD | orf9 |
| WP_003401485.1 | type VII secretion system ESX-3 target PE5 [Mycobacterium]                    | VPPAAD | 0,666666667 | LLPAAD | orf9 |
| WP_003401488.1 | type VII secretion system ESX-3 target PPE4 [Mycobacterium]                   | LLPAGL | 0,666666667 | LLPAAD | orf9 |
| WP_003401528.1 | type VII secretion system ESX-3 serine protease mycosin MycP3 [Mycobacterium] | NLPAAW | 0,666666667 | LLPAAD | orf9 |
| WP_003401533.1 | type VII secretion system ESX-3 subunit EccE3 [Mycobacterium]                 | ALVAAD | 0,666666667 | LLPAAD | orf9 |
| WP_003401607.1 | Hsp70 family protein [Mycobacterium]                                          | ELPAGD | 0,666666667 | LLPAAD | orf9 |
| WP_003401636.1 | hypothetical protein [Mycobacterium]                                          | LAPAAV | 0,666666667 | LLPAAD | orf9 |
| WP_003401666.1 | nuclear transport factor 2 family protein [Mycobacterium]                     | ALNAAD | 0,666666667 | LLPAAD | orf9 |
| WP_003401827.1 | Paal family thioesterase [Mycobacterium]                                      | LAVAAD | 0,666666667 | LLPAAD | orf9 |
| WP_003401861.1 | VWA domain-containing protein [Mycobacterium]                                 | LLPGVD | 0,666666667 | LLPAAD | orf9 |
| WP_003401863.1 | MoxR family ATPase [Mycobacterium]                                            | DLTAAD | 0,666666667 | LLPAAD | orf9 |
| WP_003402284.1 | PPE family protein [Mycobacterium]                                            | LLVAAL | 0,666666667 | LLPAAD | orf9 |
| WP_003402284.1 | PPE family protein [Mycobacterium]                                            | AQPAAD | 0,666666667 | LLPAAD | orf9 |
| WP_003402344.1 | DUF2599 domain-containing protein [Mycobacterium]                             | LSPEAD | 0,666666667 | LLPAAD | orf9 |
| WP_003402870.1 | hypothetical protein [Mycobacterium]                                          | LEPAAG | 0,666666667 | LLPAAD | orf9 |
| WP_003402886.1 | DUF2064 domain-containing protein [Mycobacterium]                             | LDSAAD | 0,666666667 | LLPAAD | orf9 |
| WP_003402917.1 | AMP-binding protein [Mycobacterium]                                           | PLVAAD | 0,666666667 | LLPAAD | orf9 |
| WP_003403125.1 | type II toxin-antitoxin system Phd/YefM family antitoxin [Mycobacterium]      | WLPAAE | 0,666666667 | LLPAAD | orf9 |
| WP_003403326.1 | malonyl CoA-ACP transacylase [Mycobacterium tuberculosis complex]             | LLPDAT | 0,666666667 | LLPAAD | orf9 |
| WP_003403405.1 | PIN domain-containing protein [Mycobacterium]                                 | LLNAGD | 0,666666667 | LLPAAD | orf9 |
| WP_003403490.1 | mycofactocin radical SAM maturase [Mycobacterium]                             | LHPTAD | 0,666666667 | LLPAAD | orf9 |
| WP_003403501.1 | mycofactocin system glycosyltransferase [Mycobacterium]                       | LAPAAR | 0,666666667 | LLPAAD | orf9 |
| WP_003403569.1 | hypothetical protein [Mycobacterium]                                          | LLAAKD | 0,666666667 | LLPAAD | orf9 |
| WP_003403610.1 | formylglycine-generating enzyme family protein [Mycobacterium]                | LATAAD | 0,666666667 | LLPAAD | orf9 |
| WP_003404002.1 | transglutaminase domain-containing protein [Mycobacterium]                    | ALVAAD | 0,666666667 | LLPAAD | orf9 |
| WP_003404007.1 | GntR family transcriptional regulator [Mycobacterium]                         | DLDAAD | 0,666666667 | LLPAAD | orf9 |
| WP_003404127.1 | hypothetical protein [Mycobacterium]                                          | TLPAPD | 0,666666667 | LLPAAD | orf9 |
| WP_003404373.1 | class I SAM-dependent methyltransferase [Mycobacterium]                       | KLPALD | 0,666666667 | LLPAAD | orf9 |



|                |                                                                                               |        |             |        |      |
|----------------|-----------------------------------------------------------------------------------------------|--------|-------------|--------|------|
| WP_003404404.1 | transposase [Mycobacterium]                                                                   | LIPDAD | 0,666666667 | LLPAAD | orf9 |
| WP_003404596.1 | DUF3027 domain-containing protein [Mycobacterium]                                             | LAPAKD | 0,666666667 | LLPAAD | orf9 |
| WP_003404684.1 | peptidoglycan-binding protein ArfA [Mycobacterium]                                            | LLIAAI | 0,666666667 | LLPAAD | orf9 |
| WP_003404903.1 | PIN domain-containing protein [Mycobacterium]                                                 | RLGAAD | 0,666666667 | LLPAAD | orf9 |
| WP_003405171.1 | dolichyl-phosphate-mannose--protein mannosyltransferase [Mycobacterium]                       | LVPVAD | 0,666666667 | LLPAAD | orf9 |
| WP_003405293.1 | septum formation initiator family protein [Mycobacterium]                                     | LPPAAP | 0,666666667 | LLPAAD | orf9 |
| WP_003405370.1 | PE domain-containing protein [Bacteria]                                                       | LLPAEE | 0,666666667 | LLPAAD | orf9 |
| WP_003405585.1 | hypothetical protein [Mycobacterium]                                                          | LLTRAD | 0,666666667 | LLPAAD | orf9 |
| WP_003405728.1 | alpha/beta hydrolase [Mycobacterium]                                                          | LLPAST | 0,666666667 | LLPAAD | orf9 |
| WP_003405746.1 | mycothiol conjugate amidase Mca [Mycobacterium]                                               | LNPAMD | 0,666666667 | LLPAAD | orf9 |
| WP_003405749.1 | hypothetical protein [Mycobacterium]                                                          | LDQAAD | 0,666666667 | LLPAAD | orf9 |
| WP_003405884.1 | alpha/beta hydrolase [Mycobacterium]                                                          | LEEAAD | 0,666666667 | LLPAAD | orf9 |
| WP_003405919.1 | PPE family protein [Mycobacterium tuberculosis complex]                                       | QLWAAD | 0,666666667 | LLPAAD | orf9 |
| WP_003405932.1 | NAD(P)/FAD-dependent oxidoreductase [Mycobacterium]                                           | LLPTAF | 0,666666667 | LLPAAD | orf9 |
| WP_003406064.1 | hypothetical protein [Mycobacterium]                                                          | QEPAAD | 0,666666667 | LLPAAD | orf9 |
| WP_003406075.1 | hypothetical protein [Mycobacterium]                                                          | LTPAAP | 0,666666667 | LLPAAD | orf9 |
| WP_003406090.1 | nitrate reductase subunit beta [Mycobacterium]                                                | ELPAAA | 0,666666667 | LLPAAD | orf9 |
| WP_003406105.1 | PPE family protein [Mycobacterium tuberculosis complex]                                       | LLPNAV | 0,666666667 | LLPAAD | orf9 |
| WP_003406154.1 | N-acetyl-1-D-myo-inositol-2-amino-2-deoxy-alpha-D-glucopyranoside deacetylase [Mycobacterium] | VLPRAD | 0,666666667 | LLPAAD | orf9 |
| WP_003406165.1 | PE family protein [Mycobacterium]                                                             | LLPRAG | 0,666666667 | LLPAAD | orf9 |
| WP_003406219.1 | PucR family transcriptional regulator [Mycobacterium]                                         | LDRAAD | 0,666666667 | LLPAAD | orf9 |
| WP_003406304.1 | type II toxin-antitoxin system VapC family toxin [Mycobacterium]                              | PLPTAD | 0,666666667 | LLPAAD | orf9 |
| WP_003406359.1 | MFS transporter [Mycobacterium]                                                               | LAPQAD | 0,666666667 | LLPAAD | orf9 |
| WP_003406602.1 | ABC transporter ATP-binding protein [Mycobacterium]                                           | LLGLAD | 0,666666667 | LLPAAD | orf9 |
| WP_003407211.1 | carbamoyl-phosphate synthase large subunit [Mycobacterium]                                    | LDPAAE | 0,666666667 | LLPAAD | orf9 |
| WP_003407264.1 | AraC family transcriptional regulator [Mycobacterium]                                         | PLPQAD | 0,666666667 | LLPAAD | orf9 |
| WP_003407315.1 | lipoarabinomannan carrier protein LprG [Mycobacterium]                                        | FGPAAD | 0,666666667 | LLPAAD | orf9 |
| WP_003407347.1 | excinuclease ABC subunit UvrC [Mycobacterium]                                                 | LDDAAD | 0,666666667 | LLPAAD | orf9 |
| WP_003407371.1 | alpha/beta hydrolase [Mycobacterium]                                                          | LLNAAN | 0,666666667 | LLPAAD | orf9 |
| WP_003407376.1 | PucR family transcriptional regulator [Mycobacterium]                                         | LLEPAD | 0,666666667 | LLPAAD | orf9 |
| WP_003407798.1 | NlpC/P60 family peptidoglycan-binding protein RipD [Mycobacterium]                            | GLAAAD | 0,666666667 | LLPAAD | orf9 |
| WP_003407926.1 | lipase [Mycobacterium]                                                                        | LLPSDD | 0,666666667 | LLPAAD | orf9 |
| WP_003408257.1 | ABC-F family ATP-binding cassette domain-containing                                           | LAPFAD | 0,666666667 | LLPAAD | orf9 |

|                |                                                                                     |        |             |        |      |
|----------------|-------------------------------------------------------------------------------------|--------|-------------|--------|------|
|                | protein [Mycobacterium]                                                             |        |             |        |      |
| WP_003408390.1 | copper transporter MctB [Mycobacterium]                                             | KLSAAD | 0,666666667 | LLPAAD | orf9 |
| WP_003408436.1 | SMC-Scp complex subunit ScpB [Mycobacterium]                                        | LLPDVD | 0,666666667 | LLPAAD | orf9 |
| WP_003408448.1 | cyclase family protein [Mycobacterium]                                              | LLPWAV | 0,666666667 | LLPAAD | orf9 |
| WP_003409271.1 | malate synthase G [Mycobacterium]                                                   | LLPEPD | 0,666666667 | LLPAAD | orf9 |
| WP_003409919.1 | TetR family transcriptional regulator Mce3R<br>[Mycobacterium]                      | PLPAGD | 0,666666667 | LLPAAD | orf9 |
| WP_003410218.1 | sn-glycerol-3-phosphate ABC transporter ATP-binding<br>protein UgpC [Mycobacterium] | LLPRAV | 0,666666667 | LLPAAD | orf9 |
| WP_003410309.1 | sugar epimerase family protein [Mycobacterium]                                      | DLPAVD | 0,666666667 | LLPAAD | orf9 |
| WP_003410735.1 | protein kinase [Mycobacterium tuberculosis complex]                                 | LLPPLD | 0,666666667 | LLPAAD | orf9 |
| WP_003410793.1 | hypothetical protein [Mycobacterium tuberculosis complex]                           | AAPAAD | 0,666666667 | LLPAAD | orf9 |
| WP_003410814.1 | antitoxin [Mycobacterium]                                                           | LQLAAD | 0,666666667 | LLPAAD | orf9 |
| WP_003411023.1 | proteasome subunit beta [Mycobacterium]                                             | LLPASI | 0,666666667 | LLPAAD | orf9 |
| WP_003411056.1 | methionine synthase [Mycobacterium]                                                 | LNPAAR | 0,666666667 | LLPAAD | orf9 |
| WP_003411110.1 | hypothetical protein [Mycobacterium]                                                | LRPGAD | 0,666666667 | LLPAAD | orf9 |
| WP_003411137.1 | YggS family pyridoxal phosphate-dependent enzyme<br>[Mycobacterium]                 | LLAAAE | 0,666666667 | LLPAAD | orf9 |
| WP_003411415.1 | membrane protein [Mycobacterium]                                                    | LPPAAY | 0,666666667 | LLPAAD | orf9 |
| WP_003411442.1 | adenylate/guanylate cyclase domain-containing protein<br>[Mycobacterium]            | LATAAD | 0,666666667 | LLPAAD | orf9 |
| WP_003411514.1 | SURF1 family protein [Bacteria]                                                     | LLPQQD | 0,666666667 | LLPAAD | orf9 |
| WP_003411559.1 | malonyl CoA-acyl carrier protein transacylase<br>[Mycobacterium]                    | LPGAAD | 0,666666667 | LLPAAD | orf9 |
| WP_003411571.1 | beta-ketoacyl-ACP synthase [Mycobacterium]                                          | VAPAAD | 0,666666667 | LLPAAD | orf9 |
| WP_003411668.1 | hypothetical protein [Mycobacterium]                                                | DLPPAD | 0,666666667 | LLPAAD | orf9 |
| WP_003411905.1 | hypothetical protein [Mycobacterium]                                                | NLPADD | 0,666666667 | LLPAAD | orf9 |
| WP_003412212.1 | decaprenyl diphosphate synthase [Mycobacterium]                                     | LPPAPD | 0,666666667 | LLPAAD | orf9 |
| WP_003412212.1 | decaprenyl diphosphate synthase [Mycobacterium]                                     | ELPAAP | 0,666666667 | LLPAAD | orf9 |
| WP_003412277.1 | mycobactin polyketide synthase MbtD [Mycobacterium]                                 | LVFAAD | 0,666666667 | LLPAAD | orf9 |
| WP_003412384.1 | SGNH/GDSL hydrolase family protein [Mycobacterium]                                  | GLPADD | 0,666666667 | LLPAAD | orf9 |
| WP_003412613.1 | resuscitation-promoting factor protein RpfE<br>[Mycobacterium]                      | LPPAPD | 0,666666667 | LLPAAD | orf9 |
| WP_003412713.1 | HAD-IB family hydrolase [Mycobacterium]                                             | GLPAVD | 0,666666667 | LLPAAD | orf9 |
| WP_003413027.1 | chorismate synthase [Mycobacterium]                                                 | DLPAID | 0,666666667 | LLPAAD | orf9 |
| WP_003413332.1 | hypothetical protein [Mycobacterium]                                                | LLVIAD | 0,666666667 | LLPAAD | orf9 |
| WP_003413373.1 | lipoprotein [Mycobacterium]                                                         | LSPATD | 0,666666667 | LLPAAD | orf9 |
| WP_003413854.1 | pyrimidine reductase family protein [Mycobacterium]                                 | QLGAAD | 0,666666667 | LLPAAD | orf9 |

|                |                                                                                  |         |             |        |      |
|----------------|----------------------------------------------------------------------------------|---------|-------------|--------|------|
| WP_003413866.1 | class I SAM-dependent methyltransferase [Mycobacterium]                          | GLPAAT  | 0,666666667 | LLPAAD | orf9 |
| WP_003413927.1 | alpha/beta fold hydrolase [Mycobacterium]                                        | LAPAAQ  | 0,666666667 | LLPAAD | orf9 |
| WP_003413944.1 | RNA polymerase sigma factor [Mycobacterium]                                      | DLDAAD  | 0,666666667 | LLPAAD | orf9 |
| WP_003413944.1 | RNA polymerase sigma factor [Mycobacterium]                                      | KLPAAQ  | 0,666666667 | LLPAAD | orf9 |
| WP_003413958.1 | sigma-70 family RNA polymerase sigma factor [Mycobacterium]                      | QSPAAD  | 0,666666667 | LLPAAD | orf9 |
| WP_003413958.1 | sigma-70 family RNA polymerase sigma factor [Mycobacterium]                      | LLNAAG  | 0,666666667 | LLPAAD | orf9 |
| WP_003414055.1 | type I restriction endonuclease subunit S [Mycobacterium]                        | DLPAAS  | 0,666666667 | LLPAAD | orf9 |
| WP_003414085.1 | PPE family protein [Mycobacterium]                                               | L TSAAD | 0,666666667 | LLPAAD | orf9 |
| WP_003414198.1 | DDE-type integrase/transposase/recombinase [Mycobacterium]                       | LTGAAD  | 0,666666667 | LLPAAD | orf9 |
| WP_003414579.1 | glutamine synthetase [Mycobacterium]                                             | LTPASD  | 0,666666667 | LLPAAD | orf9 |
| WP_003414630.1 | cell surface glycolipoprotein Mpt83 [Mycobacterium]                              | ADPAAD  | 0,666666667 | LLPAAD | orf9 |
| WP_003414635.1 | cytochrome c biogenesis protein DipZ [Mycobacterium]                             | DLPAAL  | 0,666666667 | LLPAAD | orf9 |
| WP_003414666.1 | response regulator transcription factor [Mycobacterium]                          | LLNAAG  | 0,666666667 | LLPAAD | orf9 |
| WP_003414678.1 | M23 family metallopeptidase [Mycobacterium]                                      | LLGAAP  | 0,666666667 | LLPAAD | orf9 |
| WP_003414820.1 | ribonuclease III [Mycobacterium]                                                 | LLDAAP  | 0,666666667 | LLPAAD | orf9 |
| WP_003414837.1 | phthiocerol type I polyketide synthase PpsC [Mycobacterium tuberculosis complex] | LLWLAD  | 0,666666667 | LLPAAD | orf9 |
| WP_003414837.1 | phthiocerol type I polyketide synthase PpsC [Mycobacterium tuberculosis complex] | LASAAD  | 0,666666667 | LLPAAD | orf9 |
| WP_003414837.1 | phthiocerol type I polyketide synthase PpsC [Mycobacterium tuberculosis complex] | LHDAAD  | 0,666666667 | LLPAAD | orf9 |
| WP_003415973.1 | class 1b ribonucleoside-diphosphate reductase subunit beta [Mycobacterium]       | LSPNAD  | 0,666666667 | LLPAAD | orf9 |
| WP_003415991.1 | ATP-dependent DNA ligase [Mycobacterium]                                         | GLPAAT  | 0,666666667 | LLPAAD | orf9 |
| WP_003416051.1 | HNH endonuclease [Mycobacterium]                                                 | LLGAAN  | 0,666666667 | LLPAAD | orf9 |
| WP_003416363.1 | two-component system sensor histidine kinase DevS [Mycobacterium]                | DMPAAD  | 0,666666667 | LLPAAD | orf9 |
| WP_003416815.1 | AarF/ABC1/UbiB kinase family protein [Mycobacterium]                             | LSPGAD  | 0,666666667 | LLPAAD | orf9 |
| WP_003416829.1 | NAD(+) diphosphatase [Mycobacterium]                                             | LQPIAD  | 0,666666667 | LLPAAD | orf9 |
| WP_003416833.1 | ATP-dependent helicase [Mycobacterium]                                           | LPGAAD  | 0,666666667 | LLPAAD | orf9 |
| WP_003416879.1 | isochorismate synthase [Mycobacterium]                                           | LPPPAD  | 0,666666667 | LLPAAD | orf9 |
| WP_003416933.1 | cation:proton antiporter [Mycobacterium]                                         | GLPAAA  | 0,666666667 | LLPAAD | orf9 |
| WP_003417056.1 | hypothetical protein [Mycobacterium]                                             | GLIAAD  | 0,666666667 | LLPAAD | orf9 |
| WP_003417238.1 | phospho-sugar mutase [Mycobacterium]                                             | DLPAAR  | 0,666666667 | LLPAAD | orf9 |
| WP_003417251.1 | hypothetical protein [Mycobacterium]                                             | LNPAED  | 0,666666667 | LLPAAD | orf9 |
| WP_003417254.1 | alpha/beta hydrolase [Mycobacterium]                                             | SLNAAD  | 0,666666667 | LLPAAD | orf9 |

|                |                                                                                      |        |             |        |      |
|----------------|--------------------------------------------------------------------------------------|--------|-------------|--------|------|
| WP_003417259.1 | adenosine deaminase [Mycobacterium]                                                  | DLPATD | 0,666666667 | LLPAAD | orf9 |
| WP_003417738.1 | hypothetical protein [Mycobacterium]                                                 | LLPALG | 0,666666667 | LLPAAD | orf9 |
| WP_003417741.1 | hypothetical protein [Mycobacterium]                                                 | LLPANG | 0,666666667 | LLPAAD | orf9 |
| WP_003417961.1 | beta-phosphoglucomutase family hydrolase [Mycobacterium]                             | FDPAAD | 0,666666667 | LLPAAD | orf9 |
| WP_003418005.1 | GuaB3 family IMP dehydrogenase-related protein [Mycobacterium]                       | LLEAAA | 0,666666667 | LLPAAD | orf9 |
| WP_003418326.1 | type VII secretion system ESX-4 FtsK/SpoIIIE family ATPase EccC4 [Mycobacterium]     | LLPARV | 0,666666667 | LLPAAD | orf9 |
| WP_003419226.1 | PPE family protein [Mycobacterium]                                                   | LLPIAP | 0,666666667 | LLPAAD | orf9 |
| WP_003419534.1 | membrane protein [Mycobacterium]                                                     | RAPAAD | 0,666666667 | LLPAAD | orf9 |
| WP_003419574.1 | D-alanyl-D-alanine carboxypeptidase/D-alanyl-D-alanine-endopeptidase [Mycobacterium] | LDPAAV | 0,666666667 | LLPAAD | orf9 |
| WP_003419671.1 | hypothetical protein [Mycobacterium]                                                 | LLPTLD | 0,666666667 | LLPAAD | orf9 |
| WP_003419738.1 | ArsA family ATPase [Mycobacterium]                                                   | KLPDAD | 0,666666667 | LLPAAD | orf9 |
| WP_003419746.1 | transglycosylase/D,D-transpeptidase PonA2 [Mycobacterium tuberculosis complex]       | RLPAAI | 0,666666667 | LLPAAD | orf9 |
| WP_003419770.1 | DUF4129 domain-containing protein [Mycobacterium]                                    | LNPAAG | 0,666666667 | LLPAAD | orf9 |
| WP_003420511.1 | tRNA adenosine deaminase-associated protein [Mycobacterium]                          | QRPAAD | 0,666666667 | LLPAAD | orf9 |
| WP_003420615.1 | hypothetical protein [Mycobacterium]                                                 | LLPSED | 0,666666667 | LLPAAD | orf9 |
| WP_003420620.1 | class I SAM-dependent methyltransferase [Mycobacterium]                              | ELDAAD | 0,666666667 | LLPAAD | orf9 |
| WP_003420620.1 | class I SAM-dependent methyltransferase [Mycobacterium]                              | LLAAHD | 0,666666667 | LLPAAD | orf9 |
| WP_003420620.1 | class I SAM-dependent methyltransferase [Mycobacterium]                              | DLPAAP | 0,666666667 | LLPAAD | orf9 |
| WP_003420798.1 | UDP-galactopyranose mutase [Mycobacterium]                                           | ELPAAN | 0,666666667 | LLPAAD | orf9 |
| WP_003420801.1 | exported repetitive protein [Mycobacterium]                                          | LDPGAD | 0,666666667 | LLPAAD | orf9 |
| WP_003898417.1 | SRPBCC family protein [Mycobacterium]                                                | LLQLAD | 0,666666667 | LLPAAD | orf9 |
| WP_003898437.1 | MBL fold metallo-hydrolase [Mycobacterium]                                           | LLPAVF | 0,666666667 | LLPAAD | orf9 |
| WP_003898528.1 | hypothetical protein [Mycobacterium]                                                 | SLPAND | 0,666666667 | LLPAAD | orf9 |
| WP_003898655.1 | ATP-dependent DNA ligase [Mycobacterium]                                             | PLPARD | 0,666666667 | LLPAAD | orf9 |
| WP_003898703.1 | nucleotidyl transferase AbiEii/AbiGii toxin family protein [Bacteria]                | LLLDAD | 0,666666667 | LLPAAD | orf9 |
| WP_003898761.1 | RND transporter MmpL10 [Mycobacterium]                                               | GLGAAD | 0,666666667 | LLPAAD | orf9 |
| WP_003898763.1 | alpha/beta hydrolase [Mycobacterium]                                                 | MLPAGD | 0,666666667 | LLPAAD | orf9 |
| WP_003898806.1 | AAA family ATPase [Mycobacterium]                                                    | LAEAAD | 0,666666667 | LLPAAD | orf9 |
| WP_003899131.1 | IS110 family transposase [Mycobacterium]                                             | NLWAAD | 0,666666667 | LLPAAD | orf9 |
| WP_003899145.1 | carboxylesterase/lipase family protein [Mycobacterium]                               | LLTAAA | 0,666666667 | LLPAAD | orf9 |
| WP_003899145.1 | carboxylesterase/lipase family protein [Mycobacterium]                               | LTAAAD | 0,666666667 | LLPAAD | orf9 |
| WP_003899282.1 | TPM domain-containing protein [Mycobacterium]                                        | LLDAVD | 0,666666667 | LLPAAD | orf9 |

|                |                                                                                   |        |             |        |      |
|----------------|-----------------------------------------------------------------------------------|--------|-------------|--------|------|
| WP_003899437.1 | DUF4193 domain-containing protein [Mycobacterium]                                 | ELPGAD | 0,666666667 | LLPAAD | orf9 |
| WP_003899500.1 | DUF1802 family protein [Mycobacterium tuberculosis complex]                       | LGPAAA | 0,666666667 | LLPAAD | orf9 |
| WP_003899670.1 | PE domain-containing protein [Mycobacterium]                                      | LLPAGA | 0,666666667 | LLPAAD | orf9 |
| WP_003899883.1 | 5-oxoprolinase [Mycobacterium]                                                    | LGPAAP | 0,666666667 | LLPAAD | orf9 |
| WP_003899932.1 | wax ester/triacylglycerol synthase family O-acyltransferase [Mycobacterium]       | LSPAAS | 0,666666667 | LLPAAD | orf9 |
| WP_003899969.1 | TIGR02569 family protein [Mycobacterium]                                          | APPAAD | 0,666666667 | LLPAAD | orf9 |
| WP_003900009.1 | M20 family metallopeptidase [Mycobacterium]                                       | LLPALE | 0,666666667 | LLPAAD | orf9 |
| WP_003900066.1 | NAD(P)-dependent oxidoreductase [Mycobacterium]                                   | LTPPAD | 0,666666667 | LLPAAD | orf9 |
| WP_003900072.1 | PPE family protein [Mycobacterium tuberculosis]                                   | LLPFED | 0,666666667 | LLPAAD | orf9 |
| WP_003900072.1 | PPE family protein [Mycobacterium tuberculosis]                                   | LAPAAA | 0,666666667 | LLPAAD | orf9 |
| WP_003900188.1 | hypothetical protein [Mycobacterium]                                              | LLEATD | 0,666666667 | LLPAAD | orf9 |
| WP_003900310.1 | oligopeptide ABC transporter substrate-binding protein OppA [Mycobacterium]       | LAPTAD | 0,666666667 | LLPAAD | orf9 |
| WP_003900492.1 | hypothetical protein [Mycobacterium]                                              | LLPPAR | 0,666666667 | LLPAAD | orf9 |
| WP_003900516.1 | elongation factor 4 [Mycobacterium]                                               | QLPDAD | 0,666666667 | LLPAAD | orf9 |
| WP_003900520.1 | hypothetical protein [Mycobacterium]                                              | QLPAAG | 0,666666667 | LLPAAD | orf9 |
| WP_003900529.1 | single-stranded DNA-binding protein [Mycobacterium]                               | DLPAAT | 0,666666667 | LLPAAD | orf9 |
| WP_003900586.1 | gamma-glutamyl-gamma-aminobutyrate hydrolase [Mycobacterium tuberculosis complex] | LDPAAY | 0,666666667 | LLPAAD | orf9 |
| WP_003900617.1 | GNAT family N-acetyltransferase [Mycobacterium]                                   | ALPAAA | 0,666666667 | LLPAAD | orf9 |
| WP_003900617.1 | GNAT family N-acetyltransferase [Mycobacterium]                                   | LPAAAD | 0,666666667 | LLPAAD | orf9 |
| WP_003900628.1 | patatin-like phospholipase family protein [Mycobacterium]                         | NLPYAD | 0,666666667 | LLPAAD | orf9 |
| WP_003900761.1 | galactofuranosyl transferase GltT2 [Mycobacterium]                                | VLPAAS | 0,666666667 | LLPAAD | orf9 |
| WP_003900801.1 | alpha/beta hydrolase [Mycobacterium]                                              | LRPGAD | 0,666666667 | LLPAAD | orf9 |
| WP_003900845.1 | hypothetical protein [Mycobacterium]                                              | LHPSAD | 0,666666667 | LLPAAD | orf9 |
| WP_003900866.1 | LCP family protein [Mycobacterium]                                                | SLPAPD | 0,666666667 | LLPAAD | orf9 |
| WP_003901285.1 | catalase/oxidase HPI [Mycobacterium]                                              | LEPKAD | 0,666666667 | LLPAAD | orf9 |
| WP_003901413.1 | glycerol-3-phosphate 1-O-acyltransferase [Mycobacterium]                          | LLPGRD | 0,666666667 | LLPAAD | orf9 |
| WP_003901413.1 | glycerol-3-phosphate 1-O-acyltransferase [Mycobacterium]                          | IAPAAD | 0,666666667 | LLPAAD | orf9 |
| WP_003901420.1 | type I polyketide synthase [Mycobacterium]                                        | ALPAAP | 0,666666667 | LLPAAD | orf9 |
| WP_003901458.1 | hypothetical protein [Mycobacterium]                                              | PLRAAD | 0,666666667 | LLPAAD | orf9 |
| WP_003901461.1 | glycosyltransferase [Mycobacterium]                                               | GLPARD | 0,666666667 | LLPAAD | orf9 |
| WP_003902383.1 | DAK2 domain-containing protein [Mycobacterium]                                    | VTPAAD | 0,666666667 | LLPAAD | orf9 |
| WP_003903189.1 | response regulator transcription factor [Mycobacterium]                           | RPPAAD | 0,666666667 | LLPAAD | orf9 |
| WP_003903329.1 | pyruvate, phosphate dikinase [Mycobacterium]                                      | ALDAAD | 0,666666667 | LLPAAD | orf9 |
| WP_003904400.1 | cation-translocating P-type ATPase [Mycobacterium]                                | ALSAAD | 0,666666667 | LLPAAD | orf9 |

|                |                                                                                  |        |             |        |      |
|----------------|----------------------------------------------------------------------------------|--------|-------------|--------|------|
| WP_003904931.1 | DUF1802 family protein [Mycobacterium tuberculosis complex]                      | LGPAAL | 0,666666667 | LLPAAD | orf9 |
| WP_003905015.1 | ATP-dependent helicase [Mycobacterium]                                           | LTPAAR | 0,666666667 | LLPAAD | orf9 |
| WP_003908351.1 | sulfolipid-1 RND transporter MmpL8 [Mycobacterium]                               | GLGAAD | 0,666666667 | LLPAAD | orf9 |
| WP_003909410.1 | Rv1355c family protein [Mycobacterium]                                           | LLPQPD | 0,666666667 | LLPAAD | orf9 |
| WP_003910253.1 | hypothetical protein [Mycobacterium tuberculosis complex]                        | LLPGAQ | 0,666666667 | LLPAAD | orf9 |
| WP_003910563.1 | NAD-glutamate dehydrogenase [Mycobacterium]                                      | GDPAAD | 0,666666667 | LLPAAD | orf9 |
| WP_003910563.1 | NAD-glutamate dehydrogenase [Mycobacterium]                                      | LVVAAD | 0,666666667 | LLPAAD | orf9 |
| WP_003911234.1 | TlpA family protein disulfide reductase [Mycobacterium tuberculosis complex]     | ELLAAD | 0,666666667 | LLPAAD | orf9 |
| WP_003913037.1 | GTP 3',8-cyclase MoaA [Mycobacterium]                                            | WLPRAD | 0,666666667 | LLPAAD | orf9 |
| WP_010950340.1 | PPE family protein [Mycobacterium]                                               | LLPIAA | 0,666666667 | LLPAAD | orf9 |
| WP_010950341.1 | cyclic nucleotide-binding domain-containing protein [Mycobacterium]              | LLAAAV | 0,666666667 | LLPAAD | orf9 |
| WP_010950351.1 | PE-PPE domain-containing protein [Mycobacterium]                                 | ELPAAL | 0,666666667 | LLPAAD | orf9 |
| WP_010950413.1 | adenosylcobalamin-dependent ribonucleoside-diphosphate reductase [Mycobacterium] | LRPAGD | 0,666666667 | LLPAAD | orf9 |
| WP_010950423.1 | exodeoxyribonuclease V subunit alpha [Mycobacterium]                             | LLGASD | 0,666666667 | LLPAAD | orf9 |
| WP_010950484.1 | resuscitation-promoting factor [Mycobacterium]                                   | LYPAAG | 0,666666667 | LLPAAD | orf9 |
| WP_010950506.1 | membrane protein [Mycobacterium]                                                 | FLPAAP | 0,666666667 | LLPAAD | orf9 |
| WP_010950539.1 | PPE family protein [Mycobacterium]                                               | LLSAAL | 0,666666667 | LLPAAD | orf9 |
| WP_010950555.1 | isoleucine--tRNA ligase [Mycobacterium]                                          | RLVAAD | 0,666666667 | LLPAAD | orf9 |
| WP_010950580.1 | biotin carboxylase [Mycobacterium]                                               | LTPAAP | 0,666666667 | LLPAAD | orf9 |
| WP_010950583.1 | respiratory nitrate reductase subunit gamma [Mycobacterium]                      | DGPAAD | 0,666666667 | LLPAAD | orf9 |
| WP_010950613.1 | aminomethyl-transferring glycine dehydrogenase [Mycobacterium]                   | LPPAAS | 0,666666667 | LLPAAD | orf9 |
| WP_010950634.1 | lipase LipD [Mycobacterium]                                                      | LLPQAK | 0,666666667 | LLPAAD | orf9 |
| WP_010950704.1 | non-ribosomal peptide synthetase [Mycobacterium]                                 | LRPAAQ | 0,666666667 | LLPAAD | orf9 |
| WP_010950740.1 | aspartate--tRNA ligase [Mycobacterium]                                           | LLGAAR | 0,666666667 | LLPAAD | orf9 |
| WP_010950800.1 | phthiocerol type I polyketide synthase PpsA [Mycobacterium tuberculosis]         | LLPARN | 0,666666667 | LLPAAD | orf9 |
| WP_010950845.1 | alpha/beta hydrolase [Mycobacterium]                                             | LAVAAD | 0,666666667 | LLPAAD | orf9 |
| WP_010950867.1 | arylsulfatase AtsB [Mycobacterium]                                               | LFPAWD | 0,666666667 | LLPAAD | orf9 |
| WP_010950941.1 | terminal beta-(1-2)-arabinofuranosyltransferase [Mycobacterium]                  | PLTAAD | 0,666666667 | LLPAAD | orf9 |
| WP_011799082.1 | L,D-transpeptidase family protein [Mycobacterium]                                | LPPALD | 0,666666667 | LLPAAD | orf9 |
| WP_011799102.1 | PPE family protein [Mycobacterium tuberculosis complex]                          | LLWRAD | 0,666666667 | LLPAAD | orf9 |
| WP_011799123.1 | arylsulfatase AtsA [Mycobacterium]                                               | GLPLAD | 0,666666667 | LLPAAD | orf9 |

|                |                                                                        |        |             |        |      |
|----------------|------------------------------------------------------------------------|--------|-------------|--------|------|
| WP_011799125.1 | PE family protein [Mycobacterium tuberculosis]                         | LLLGAD | 0,666666667 | LLPAAD | orf9 |
| WP_011799126.1 | PE family protein [Mycobacterium tuberculosis]                         | LLGAAG | 0,666666667 | LLPAAD | orf9 |
| WP_011799137.1 | transglycosylase family protein [Mycobacterium tuberculosis]           | PLPAAP | 0,666666667 | LLPAAD | orf9 |
| WP_011799137.1 | transglycosylase family protein [Mycobacterium tuberculosis]           | PLPAAP | 0,666666667 | LLPAAD | orf9 |
| WP_011799137.1 | transglycosylase family protein [Mycobacterium tuberculosis]           | PLPAAP | 0,666666667 | LLPAAD | orf9 |
| WP_011799137.1 | transglycosylase family protein [Mycobacterium tuberculosis]           | LAPPAD | 0,666666667 | LLPAAD | orf9 |
| WP_011799138.1 | diiron oxygenase [Mycobacterium]                                       | ILPATD | 0,666666667 | LLPAAD | orf9 |
| WP_011799146.1 | hypothetical protein [Mycobacterium]                                   | TLPAAV | 0,666666667 | LLPAAD | orf9 |
| WP_011799163.1 | RNA polymerase sigma factor SigI [Mycobacterium]                       | LSPRAD | 0,666666667 | LLPAAD | orf9 |
| WP_011799172.1 | LuxR family transcriptional regulator [Mycobacterium]                  | LLSAAT | 0,666666667 | LLPAAD | orf9 |
| WP_011799173.1 | PPE family protein [Mycobacterium tuberculosis]                        | LLPFED | 0,666666667 | LLPAAD | orf9 |
| WP_011799190.1 | RND transporter MmpL12 [Mycobacterium]                                 | LNEAAD | 0,666666667 | LLPAAD | orf9 |
| WP_011799195.1 | fumarate reductase subunit C [Mycobacterium tuberculosis]              | VLAAAD | 0,666666667 | LLPAAD | orf9 |
| WP_011799198.1 | ATP-dependent dethiobiotin synthetase BioD [Mycobacterium]             | ALPARD | 0,666666667 | LLPAAD | orf9 |
| WP_011799206.1 | acyltransferase domain-containing protein [Mycobacterium tuberculosis] | VAPAAD | 0,666666667 | LLPAAD | orf9 |
| WP_011799206.1 | acyltransferase domain-containing protein [Mycobacterium tuberculosis] | LLSAAV | 0,666666667 | LLPAAD | orf9 |
| WP_011799213.1 | FAD-dependent oxidoreductase [Mycobacterium]                           | LLPEAT | 0,666666667 | LLPAAD | orf9 |
| WP_011799220.1 | PPE family protein [Mycobacterium]                                     | VLPTAD | 0,666666667 | LLPAAD | orf9 |
| WP_011799239.1 | DEAD/DEAH box helicase [Mycobacterium]                                 | LITAAD | 0,666666667 | LLPAAD | orf9 |
| WP_011799239.1 | DEAD/DEAH box helicase [Mycobacterium]                                 | LKPGAD | 0,666666667 | LLPAAD | orf9 |
| WP_011799240.1 | type I polyketide synthase [Mycobacterium tuberculosis]                | LLPATL | 0,666666667 | LLPAAD | orf9 |
| WP_011799240.1 | type I polyketide synthase [Mycobacterium tuberculosis]                | GLDAAD | 0,666666667 | LLPAAD | orf9 |
| WP_011799240.1 | type I polyketide synthase [Mycobacterium tuberculosis]                | LIPDAD | 0,666666667 | LLPAAD | orf9 |
| WP_011799244.1 | 5'-3' exonuclease [Mycobacterium tuberculosis complex]                 | PLVAAD | 0,666666667 | LLPAAD | orf9 |
| WP_011799261.1 | non-ribosomal peptide synthetase [Mycobacterium]                       | SHPAAD | 0,666666667 | LLPAAD | orf9 |
| WP_011799261.1 | non-ribosomal peptide synthetase [Mycobacterium]                       | PLPTAD | 0,666666667 | LLPAAD | orf9 |
| WP_011799265.1 | ATP-dependent Clp protease ATP-binding subunit ClpX [Mycobacterium]    | LIQAAD | 0,666666667 | LLPAAD | orf9 |
| WP_011799284.1 | membrane protein [Mycobacterium]                                       | LGGAAD | 0,666666667 | LLPAAD | orf9 |
| WP_011799284.1 | membrane protein [Mycobacterium]                                       | GLPAAA | 0,666666667 | LLPAAD | orf9 |
| WP_011799301.1 | [protein-PII]                                                          | LSLAAD | 0,666666667 | LLPAAD | orf9 |

|                |                                                                                                                              |          |             |          |      |
|----------------|------------------------------------------------------------------------------------------------------------------------------|----------|-------------|----------|------|
| WP_011799302.1 | phthiocerol type I polyketide synthase PpsB<br>[Mycobacterium tuberculosis]                                                  | LQPMAD   | 0,666666667 | LLPAAD   | orf9 |
| WP_011799302.1 | phthiocerol type I polyketide synthase PpsB<br>[Mycobacterium tuberculosis]                                                  | LLAAAY   | 0,666666667 | LLPAAD   | orf9 |
| WP_011799302.1 | phthiocerol type I polyketide synthase PpsB<br>[Mycobacterium tuberculosis]                                                  | LLPAPE   | 0,666666667 | LLPAAD   | orf9 |
| WP_011799325.1 | PPE family protein [Mycobacterium tuberculosis]                                                                              | ALPAAP   | 0,666666667 | LLPAAD   | orf9 |
| WP_011799326.1 | DUF4129 domain-containing protein [Mycobacterium]                                                                            | HLPADD   | 0,666666667 | LLPAAD   | orf9 |
| WP_011799343.1 | PPE family protein [Mycobacterium tuberculosis]                                                                              | LMWAAD   | 0,666666667 | LLPAAD   | orf9 |
| WP_011799362.1 | type VII secretion system ESX-1 target EspA<br>[Mycobacterium tuberculosis]                                                  | LGSAAD   | 0,666666667 | LLPAAD   | orf9 |
| WP_011799362.1 | type VII secretion system ESX-1 target EspA<br>[Mycobacterium tuberculosis]                                                  | LRPRAD   | 0,666666667 | LLPAAD   | orf9 |
| WP_011799364.1 | type I DNA topoisomerase [Mycobacterium]                                                                                     | PEPAAD   | 0,666666667 | LLPAAD   | orf9 |
| WP_011799379.1 | type I polyketide synthase [Mycobacterium]                                                                                   | QLAAAD   | 0,666666667 | LLPAAD   | orf9 |
| WP_015385225.1 | transglycosylase/D,D-transpeptidase PonA1<br>[Mycobacterium]                                                                 | LDPAVD   | 0,666666667 | LLPAAD   | orf9 |
| WP_071854213.1 | thiol reductant ABC exporter subunit CydD<br>[Mycobacterium]                                                                 | LAPAAW   | 0,666666667 | LLPAAD   | orf9 |
| WP_162014417.1 | hypothetical protein [Mycobacterium tuberculosis]                                                                            | LLAAQD   | 0,666666667 | LLPAAD   | orf9 |
| WP_003401003.1 | PE-PPE domain-containing protein [Mycobacterium]                                                                             | LPQIQLPQ | 0,625       | LPQRQKKQ | orf9 |
| WP_003406369.1 | amidase [Mycobacterium]                                                                                                      | LPVRCGKQ | 0,625       | LPQRQKKQ | orf9 |
| WP_003410003.1 | DUF2384 domain-containing protein [Mycobacterium]                                                                            | VPQRLNKQ | 0,625       | LPQRQKKQ | orf9 |
| WP_010950678.1 | hypothetical protein [Mycobacterium]                                                                                         | LPQRAAYQ | 0,625       | LPQRQKKQ | orf9 |
| WP_003418002.1 | cholesterol oxidase [Mycobacterium]                                                                                          | QGTDVPRW | 0,625       | QGTDYKHW | orf9 |
| WP_011799069.1 | endo-1,4-beta-glucanase [Mycobacterium]                                                                                      | TGTDYRGW | 0,625       | QGTDYKHW | orf9 |
| WP_003400356.1 | Stk1 family PASTA domain-containing Ser/Thr kinase<br>[Mycobacterium]                                                        | SQASVDSP | 0,625       | SQASSRSS | orf9 |
| WP_003402870.1 | hypothetical protein [Mycobacterium]                                                                                         | FQASSGGS | 0,625       | SQASSRSS | orf9 |
| WP_003405142.1 | FmdB family transcriptional regulator [Mycobacterium]                                                                        | STKSSGSS | 0,625       | SQASSRSS | orf9 |
| WP_003405142.1 | FmdB family transcriptional regulator [Mycobacterium]                                                                        | SSGSSGSS | 0,625       | SQASSRSS | orf9 |
| WP_003405142.1 | FmdB family transcriptional regulator [Mycobacterium]                                                                        | SSGSSGSS | 0,625       | SQASSRSS | orf9 |
| WP_003405267.1 | bifunctional UDP-N-acetylglucosamine<br>diphosphorylase/glucosamine-1-phosphate N-<br>acetyltransferase GImU [Mycobacterium] | AQASKRAS | 0,625       | SQASSRSS | orf9 |
| WP_003408092.1 | excinuclease ABC subunit UvrA [Mycobacterium]                                                                                | SAATSRSN | 0,625       | SQASSRSS | orf9 |
| WP_003409877.1 | hypothetical protein [Mycobacterium]                                                                                         | SQWSGRST | 0,625       | SQASSRSS | orf9 |
| WP_003414001.1 | tRNA (N6-isopentenyl adenosine(37)-C2)-<br>methylthiotransferase MiaB [Mycobacterium]                                        | SLPSSRES | 0,625       | SQASSRSS | orf9 |



|                |                                                                                                                                                                                      |           |       |           |      |
|----------------|--------------------------------------------------------------------------------------------------------------------------------------------------------------------------------------|-----------|-------|-----------|------|
| WP_003418324.1 | type VII secretion-associated protein [Mycobacterium]                                                                                                                                | RQASSGVS  | 0,625 | SQASSRSS  | orf9 |
| WP_003898705.1 | hypothetical protein [Bacteria]                                                                                                                                                      | SLPSSRPS  | 0,625 | SQASSRSS  | orf9 |
| WP_003898731.1 | hypothetical protein [Mycobacterium]                                                                                                                                                 | VQASHRSI  | 0,625 | SQASSRSS  | orf9 |
| WP_003899255.1 | pyridoxal phosphate-dependent aminotransferase [Mycobacterium]                                                                                                                       | ARASSGSS  | 0,625 | SQASSRSS  | orf9 |
| WP_003900580.1 | type III-A CRISPR-associated protein Cas10/Csm1 [Mycobacterium]                                                                                                                      | SQASNRAL  | 0,625 | SQASSRSS  | orf9 |
| WP_003901356.1 | DUF2236 domain-containing protein [Mycobacterium]                                                                                                                                    | STASSPVS  | 0,625 | SQASSRSS  | orf9 |
| WP_010950509.1 | multifunctional oxoglutarate decarboxylase/oxoglutarate dehydrogenase thiamine pyrophosphate-binding subunit/dihydrolipoyllysine-residue succinyltransferase subunit [Mycobacterium] | SAPSSGSS  | 0,625 | SQASSRSS  | orf9 |
| WP_010950554.1 | type I polyketide synthase [Mycobacterium]                                                                                                                                           | SQASERAR  | 0,625 | SQASSRSS  | orf9 |
| WP_010950568.1 | 30S ribosomal protein S1 [Mycobacterium]                                                                                                                                             | SSASSAPS  | 0,625 | SQASSRSS  | orf9 |
| WP_010950615.1 | solute-binding protein [Mycobacterium]                                                                                                                                               | SQAISDSR  | 0,625 | SQASSRSS  | orf9 |
| WP_010950660.1 | PPE family protein [Mycobacterium]                                                                                                                                                   | SAASSAAS  | 0,625 | SQASSRSS  | orf9 |
| WP_010950745.1 | protein translocase subunit SecF [Mycobacterium]                                                                                                                                     | TQASSQSA  | 0,625 | SQASSRSS  | orf9 |
| WP_010950790.1 | magnesium chelatase subunit D family protein [Mycobacterium]                                                                                                                         | SQPNSRSK  | 0,625 | SQASSRSS  | orf9 |
| WP_011799143.1 | PE domain-containing protein [Mycobacterium tuberculosis]                                                                                                                            | SQASSTYA  | 0,625 | SQASSRSS  | orf9 |
| WP_011799362.1 | type VII secretion system ESX-1 target EspA [Mycobacterium tuberculosis]                                                                                                             | SLASSASL  | 0,625 | SQASSRSS  | orf9 |
| WP_011799363.1 | hypoxanthine phosphoribosyltransferase [Mycobacterium]                                                                                                                               | SYGSSASS  | 0,625 | SQASSRSS  | orf9 |
| WP_003402100.1 | protein kinase [Mycobacterium]                                                                                                                                                       | ALPPTPEPR | 0,625 | TFPPTPEPK | orf9 |
| WP_003404395.1 | S-sulfocysteine synthase CysK2 [Mycobacterium]                                                                                                                                       | GQPPTPEPD | 0,625 | TFPPTPEPK | orf9 |
| WP_003412373.1 | ComEA family DNA-binding protein [Mycobacterium]                                                                                                                                     | TGPKTAPK  | 0,625 | TFPPTPEPK | orf9 |
| WP_003414748.1 | signal recognition particle protein [Mycobacterium]                                                                                                                                  | TRGPTPPK  | 0,625 | TFPPTPEPK | orf9 |
| WP_003898724.1 | hypothetical protein [Mycobacterium]                                                                                                                                                 | TPPPTTPP  | 0,625 | TFPPTPEPK | orf9 |
| WP_003900169.1 | hypothetical protein [Mycobacterium tuberculosis complex]                                                                                                                            | TAPPTTPV  | 0,625 | TFPPTPEPK | orf9 |
| WP_003900169.1 | hypothetical protein [Mycobacterium tuberculosis complex]                                                                                                                            | TTPPTTPP  | 0,625 | TFPPTPEPK | orf9 |
| WP_003900169.1 | hypothetical protein [Mycobacterium tuberculosis complex]                                                                                                                            | TTPPTTPV  | 0,625 | TFPPTPEPK | orf9 |
| WP_003900169.1 | hypothetical protein [Mycobacterium tuberculosis complex]                                                                                                                            | TTPPTTPP  | 0,625 | TFPPTPEPK | orf9 |
| WP_003900169.1 | hypothetical protein [Mycobacterium tuberculosis complex]                                                                                                                            | TTPPTTPV  | 0,625 | TFPPTPEPK | orf9 |
| WP_003900169.1 | hypothetical protein [Mycobacterium tuberculosis complex]                                                                                                                            | TTPPTTPP  | 0,625 | TFPPTPEPK | orf9 |
| WP_003900169.1 | hypothetical protein [Mycobacterium tuberculosis complex]                                                                                                                            | TTPPTTPV  | 0,625 | TFPPTPEPK | orf9 |
| WP_003900169.1 | hypothetical protein [Mycobacterium tuberculosis complex]                                                                                                                            | TTPPTTPP  | 0,625 | TFPPTPEPK | orf9 |
| WP_010950435.1 | DUF4226 domain-containing protein [Mycobacterium]                                                                                                                                    | PFPYQPK   | 0,625 | TFPPTPEPK | orf9 |
| WP_010950506.1 | membrane protein [Mycobacterium]                                                                                                                                                     | PFPPTAPP  | 0,625 | TFPPTPEPK | orf9 |
| WP_011799356.1 | PE family protein [Mycobacterium tuberculosis]                                                                                                                                       | VFMPTEPQ  | 0,625 | TFPPTPEPK | orf9 |

|                |                                                                        |        |             |        |    |
|----------------|------------------------------------------------------------------------|--------|-------------|--------|----|
| WP_003899841.1 | virulence factor Mce family protein [Mycobacterium]                    | QSFGRD | 0,833333333 | QQFGRD | sg |
| WP_011799314.1 | acyl-CoA dehydrogenase [Mycobacterium]                                 | QQFGRT | 0,833333333 | QQFGRD | sg |
| WP_003400000.1 | type VII secretion system ESX-1 subunit EccE1 [Mycobacterium]          | LYQQVI | 0,666666667 | LYQDVN | sg |
| WP_003400893.1 | maltose alpha-D-glucosyltransferase [Mycobacterium]                    | GYQAVN | 0,666666667 | LYQDVN | sg |
| WP_003401309.1 | acetyl-CoA C-acetyltransferase [Mycobacterium]                         | LYRDDN | 0,666666667 | LYQDVN | sg |
| WP_003402089.1 | phosphate acetyltransferase [Mycobacterium]                            | LTQAVN | 0,666666667 | LYQDVN | sg |
| WP_003402097.1 | acetate kinase [Mycobacterium]                                         | LDQDRN | 0,666666667 | LYQDVN | sg |
| WP_003402143.1 | hypothetical protein [Mycobacterium]                                   | LYADGN | 0,666666667 | LYQDVN | sg |
| WP_003406167.1 | bifunctional FO biosynthesis protein CofGH [Mycobacterium]             | LARDVN | 0,666666667 | LYQDVN | sg |
| WP_003406887.1 | co-chaperone YbbN [Mycobacterium tuberculosis complex]                 | LNQDVS | 0,666666667 | LYQDVN | sg |
| WP_003408180.1 | argininosuccinate lyase [Mycobacterium]                                | LAQDVA | 0,666666667 | LYQDVN | sg |
| WP_003409339.1 | GlsB/YeaQ/YmgE family stress response membrane protein [Mycobacterium] | LGVDVN | 0,666666667 | LYQDVN | sg |
| WP_003411972.1 | PE family protein [Mycobacterium]                                      | LAQVVN | 0,666666667 | LYQDVN | sg |
| WP_003413230.1 | ABC transporter permease [Mycobacterium]                               | GYQTVN | 0,666666667 | LYQDVN | sg |
| WP_003414630.1 | cell surface glycolipoprotein Mpt83 [Mycobacterium]                    | LNPDVN | 0,666666667 | LYQDVN | sg |
| WP_003414814.1 | DNA-formamidopyrimidine glycosylase [Mycobacterium]                    | LYVNVN | 0,666666667 | LYQDVN | sg |
| WP_003416086.1 | SPFH domain-containing protein [Mycobacterium]                         | LRQDVG | 0,666666667 | LYQDVN | sg |
| WP_003416605.1 | hypothetical protein [Mycobacterium]                                   | LHQHVN | 0,666666667 | LYQDVN | sg |
| WP_003419733.1 | RidA family protein [Mycobacterium]                                    | LGADVN | 0,666666667 | LYQDVN | sg |
| WP_003899294.1 | molecular chaperone DnaJ [Mycobacterium]                               | LHPDVN | 0,666666667 | LYQDVN | sg |
| WP_003900467.1 | PPE family protein [Mycobacterium]                                     | LVPDVN | 0,666666667 | LYQDVN | sg |
| WP_003900866.1 | LCP family protein [Mycobacterium]                                     | DGQDVN | 0,666666667 | LYQDVN | sg |
| WP_003901231.1 | cytochrome P450 [Mycobacterium]                                        | LQQRVN | 0,666666667 | LYQDVN | sg |
| WP_003911668.1 | accessory Sec system translocase SecA2 [Mycobacterium tuberculosis]    | LVTDVN | 0,666666667 | LYQDVN | sg |
| WP_010950653.1 | hypothetical protein [Mycobacterium]                                   | LSQYVN | 0,666666667 | LYQDVN | sg |
| WP_010950668.1 | hypothetical protein [Mycobacterium]                                   | LDQDVR | 0,666666667 | LYQDVN | sg |
| WP_011799106.1 | zinc metalloproteinase [Mycobacterium]                                 | TYQLVN | 0,666666667 | LYQDVN | sg |
| WP_011799126.1 | PE family protein [Mycobacterium tuberculosis]                         | LQQDVI | 0,666666667 | LYQDVN | sg |
| WP_011799357.1 | PE family protein [Mycobacterium tuberculosis]                         | LSQDGN | 0,666666667 | LYQDVN | sg |
| WP_011799357.1 | PE family protein [Mycobacterium tuberculosis]                         | LSQDGN | 0,666666667 | LYQDVN | sg |
| WP_011799357.1 | PE family protein [Mycobacterium tuberculosis]                         | LSQDGN | 0,666666667 | LYQDVN | sg |
| WP_011799357.1 | PE family protein [Mycobacterium tuberculosis]                         | LSQDGN | 0,666666667 | LYQDVN | sg |
| WP_071854216.1 | ArsA family ATPase [Mycobacterium]                                     | LVQDEN | 0,666666667 | LYQDVN | sg |
| WP_003400425.1 | fatty acyl-AMP ligase [Mycobacterium]                                  | EQFGRA | 0,666666667 | QQFGRD | sg |

|                |                                                                                                           |        |             |        |    |
|----------------|-----------------------------------------------------------------------------------------------------------|--------|-------------|--------|----|
| WP_003401234.1 | hypothetical protein [Mycobacterium]                                                                      | QEFQVD | 0,666666667 | QQFGRD | sg |
| WP_003401392.1 | acyl-CoA dehydrogenase [Mycobacterium]                                                                    | EQFGRP | 0,666666667 | QQFGRD | sg |
| WP_003401972.1 | acyl-CoA dehydrogenase [Mycobacterium]                                                                    | TQFGRP | 0,666666667 | QQFGRD | sg |
| WP_003402400.1 | hypothetical protein [Mycobacterium]                                                                      | AQNGRD | 0,666666667 | QQFGRD | sg |
| WP_003403114.1 | virulence factor Mce family protein [Mycobacterium]                                                       | QAWGRD | 0,666666667 | QQFGRD | sg |
| WP_003403610.1 | formylglycine-generating enzyme family protein [Mycobacterium]                                            | HPFGRD | 0,666666667 | QQFGRD | sg |
| WP_003404651.1 | NAD(P)/FAD-dependent oxidoreductase [Mycobacterium]                                                       | QLTGRD | 0,666666667 | QQFGRD | sg |
| WP_003404890.1 | bifunctional phosphoribosylaminoimidazolecarboxamide formyltransferase/IMP cyclohydrolase [Mycobacterium] | QWFGRS | 0,666666667 | QQFGRD | sg |
| WP_003404895.1 | VWA domain-containing protein [Mycobacterium]                                                             | QQFSGD | 0,666666667 | QQFGRD | sg |
| WP_003406259.1 | serine protease HtrA [Mycobacterium]                                                                      | QAFGRP | 0,666666667 | QQFGRD | sg |
| WP_003407374.1 | acyltransferase family protein [Mycobacterium]                                                            | KQFGED | 0,666666667 | QQFGRD | sg |
| WP_003408069.1 | dephospho-CoA kinase [Mycobacterium]                                                                      | DAFGRD | 0,666666667 | QQFGRD | sg |
| WP_003408165.1 | ornithine carbamoyltransferase [Mycobacterium]                                                            | TQLGRD | 0,666666667 | QQFGRD | sg |
| WP_003408499.1 | serine hydrolase [Mycobacterium]                                                                          | QDFGRG | 0,666666667 | QQFGRD | sg |
| WP_003408854.1 | type VII secretion system ESX-5 serine protease mycosin MycP5 [Mycobacterium]                             | WQFGRG | 0,666666667 | QQFGRD | sg |
| WP_003408859.1 | type VII secretion system ESX-5 subunit EccE5 [Mycobacterium]                                             | RRFGRD | 0,666666667 | QQFGRD | sg |
| WP_003409179.1 | PPE family protein [Mycobacterium]                                                                        | QGFGRA | 0,666666667 | QQFGRD | sg |
| WP_003409870.1 | hypothetical protein [Mycobacterium]                                                                      | GQLGRD | 0,666666667 | QQFGRD | sg |
| WP_003410221.1 | carbohydrate ABC transporter permease [Mycobacterium]                                                     | QFRGRD | 0,666666667 | QQFGRD | sg |
| WP_003410775.1 | YafY family transcriptional regulator [Mycobacterium]                                                     | QLGGRD | 0,666666667 | QQFGRD | sg |
| WP_003411056.1 | methionine synthase [Mycobacterium]                                                                       | QQRGRF | 0,666666667 | QQFGRD | sg |
| WP_003411130.1 | hypothetical protein [Mycobacterium]                                                                      | QQGGAD | 0,666666667 | QQFGRD | sg |
| WP_003411214.1 | D,D-transpeptidase PbpB [Mycobacterium tuberculosis complex]                                              | QQRLRD | 0,666666667 | QQFGRD | sg |
| WP_003411946.1 | carbohydrate ABC transporter permease [Mycobacterium]                                                     | QFRGRD | 0,666666667 | QQFGRD | sg |
| WP_003411969.1 | ATP-binding cassette domain-containing protein [Mycobacterium]                                            | DQQGRD | 0,666666667 | QQFGRD | sg |
| WP_003413373.1 | lipoprotein [Mycobacterium]                                                                               | RQFGRV | 0,666666667 | QQFGRD | sg |
| WP_003414151.1 | metallophosphoesterase [Mycobacterium]                                                                    | QIFGRA | 0,666666667 | QQFGRD | sg |
| WP_003414201.1 | AAA family ATPase [Mycobacterium]                                                                         | MPFGRD | 0,666666667 | QQFGRD | sg |
| WP_003417889.1 | wax ester/triacylglycerol synthase family O-acyltransferase [Mycobacterium]                               | QQSGRR | 0,666666667 | QQFGRD | sg |
| WP_003418289.1 | glutamine--fructose-6-phosphate transaminase (isomerizing) [Mycobacterium]                                | LQAGRD | 0,666666667 | QQFGRD | sg |
| WP_003419352.1 | acyl-CoA/acyl-ACP dehydrogenase [Mycobacterium]                                                           | VQFGRP | 0,666666667 | QQFGRD | sg |

|                |                                                                                      |          |             |          |    |
|----------------|--------------------------------------------------------------------------------------|----------|-------------|----------|----|
| WP_003420783.1 | esterase family protein [Mycobacterium]                                              | QQFGGV   | 0,666666667 | QQFGRD   | sg |
| WP_003898783.1 | trehalose ABC transporter substrate-binding protein LpqY [Mycobacterium]             | QQFGGR   | 0,666666667 | QQFGRD   | sg |
| WP_003899696.1 | arabinosyltransferase EmbA [Mycobacterium]                                           | QAFGPD   | 0,666666667 | QQFGRD   | sg |
| WP_003899759.1 | outer membrane channel protein/necrotizing toxin glycohydrolase CpnT [Mycobacterium] | APFGRD   | 0,666666667 | QQFGRD   | sg |
| WP_003899976.1 | hypothetical protein [Mycobacterium tuberculosis complex]                            | QQFGLG   | 0,666666667 | QQFGRD   | sg |
| WP_003900650.1 | phosphotransferase family protein [Mycobacterium]                                    | QQDGRS   | 0,666666667 | QQFGRD   | sg |
| WP_003905015.1 | ATP-dependent helicase [Mycobacterium]                                               | QQLGRR   | 0,666666667 | QQFGRD   | sg |
| WP_003910308.1 | PE family protein [Mycobacterium tuberculosis complex]                               | QQFVRA   | 0,666666667 | QQFGRD   | sg |
| WP_003911788.1 | pyruvate dehydrogenase (acetyl-transferring), homodimeric type [Mycobacterium]       | HFFGRD   | 0,666666667 | QQFGRD   | sg |
| WP_003915348.1 | transposase [Mycobacterium tuberculosis]                                             | LEFGRD   | 0,666666667 | QQFGRD   | sg |
| WP_010950361.1 | trehalose monomycolate RND transporter MmpL3 [Mycobacterium]                         | QVYGRD   | 0,666666667 | QQFGRD   | sg |
| WP_010950488.1 | PE family protein [Mycobacterium tuberculosis]                                       | GQFGGD   | 0,666666667 | QQFGRD   | sg |
| WP_010950647.1 | FMN-binding protein Acg [Mycobacterium]                                              | VTFGRD   | 0,666666667 | QQFGRD   | sg |
| WP_010950910.1 | acyl-CoA/acyl-ACP dehydrogenase [Mycobacterium]                                      | TQFGRA   | 0,666666667 | QQFGRD   | sg |
| WP_011799096.1 | PE family protein [Mycobacterium tuberculosis]                                       | QLLGRD   | 0,666666667 | QQFGRD   | sg |
| WP_011799162.1 | type I polyketide synthase [Mycobacterium]                                           | TQCGRD   | 0,666666667 | QQFGRD   | sg |
| WP_011799185.1 | transcriptional regulator [Mycobacterium]                                            | QQVGRG   | 0,666666667 | QQFGRD   | sg |
| WP_011799190.1 | RND transporter MmpL12 [Mycobacterium]                                               | QIFSRD   | 0,666666667 | QQFGRD   | sg |
| WP_011799208.1 | amino acid permease [Mycobacterium]                                                  | QQLGRG   | 0,666666667 | QQFGRD   | sg |
| WP_011799328.1 | hypothetical protein [Mycobacterium]                                                 | QVDGRD   | 0,666666667 | QQFGRD   | sg |
| WP_003901535.1 | sulfatase-like hydrolase/transferase [Mycobacterium]                                 | AAQVAYRE | 0,625       | AMQMAYRF | sg |
| WP_003406299.1 | sn-glycerol-3-phosphate ABC transporter ATP-binding protein UgpC [Mycobacterium]     | FGEVTLAP | 0,625       | FGEVFNAT | sg |
| WP_003899426.1 | cell division protein ZapE [Mycobacterium]                                           | FAEVSFAT | 0,625       | FGEVFNAT | sg |
| WP_010950583.1 | respiratory nitrate reductase subunit gamma [Mycobacterium]                          | RGPVFMAT | 0,625       | FGEVFNAT | sg |
| WP_011799162.1 | type I polyketide synthase [Mycobacterium]                                           | FAEAFHAT | 0,625       | FGEVFNAT | sg |
| WP_011799173.1 | PPE family protein [Mycobacterium tuberculosis]                                      | FGGVSNAL | 0,625       | FGEVFNAT | sg |
| WP_003400075.1 | hypothetical protein [Mycobacterium]                                                 | GAGDLASP | 0,625       | GAGICASY | sg |
| WP_003402855.1 | PE family protein [Mycobacterium tuberculosis complex]                               | GAGGAASI | 0,625       | GAGICASY | sg |
| WP_003404004.1 | LLM class flavin-dependent oxidoreductase [Mycobacterium]                            | GAGQCAPS | 0,625       | GAGICASY | sg |
| WP_003405370.1 | PE domain-containing protein [Bacteria]                                              | GAGNWASA | 0,625       | GAGICASY | sg |
| WP_003413891.1 | 1-deoxy-D-xylulose-5-phosphate synthase [Mycobacterium]                              | GTGVCASD | 0,625       | GAGICASY | sg |

|                |                                                                   |          |       |          |    |
|----------------|-------------------------------------------------------------------|----------|-------|----------|----|
| WP_003414032.1 | transcriptional regulator ClgR [Mycobacterium]                    | GATIDAST | 0,625 | GAGICASY | sg |
| WP_003414086.1 | PE domain-containing protein [Mycobacterium tuberculosis complex] | GAGNWASA | 0,625 | GAGICASY | sg |
| WP_003416381.1 | PPE family protein [Mycobacterium tuberculosis complex]           | GAGGAASV | 0,625 | GAGICASY | sg |
| WP_003418300.1 | hypothetical protein [Mycobacterium]                              | TAGVAASY | 0,625 | GAGICASY | sg |
| WP_010886090.1 | PE family protein [Mycobacterium tuberculosis]                    | GAGGAASG | 0,625 | GAGICASY | sg |
| WP_010950488.1 | PE family protein [Mycobacterium tuberculosis]                    | GAGAGASG | 0,625 | GAGICASY | sg |
| WP_010950488.1 | PE family protein [Mycobacterium tuberculosis]                    | GAGGQASP | 0,625 | GAGICASY | sg |
| WP_010950524.1 | PE family protein [Mycobacterium tuberculosis complex]            | GAGAYASA | 0,625 | GAGICASY | sg |
| WP_010950570.1 | PE family protein [Mycobacterium tuberculosis]                    | GAGGNASL | 0,625 | GAGICASY | sg |
| WP_010950666.1 | PE family protein [Mycobacterium tuberculosis]                    | GAGGSASG | 0,625 | GAGICASY | sg |
| WP_011799095.1 | PE family protein [Mycobacterium tuberculosis]                    | GAGGVASS | 0,625 | GAGICASY | sg |
| WP_011799096.1 | PE family protein [Mycobacterium tuberculosis]                    | GAGGRAST | 0,625 | GAGICASY | sg |
| WP_011799125.1 | PE family protein [Mycobacterium tuberculosis]                    | GAGAYASA | 0,625 | GAGICASY | sg |
| WP_011799136.1 | DNA-binding protein [Mycobacterium]                               | GAGVDASR | 0,625 | GAGICASY | sg |
| WP_011799231.1 | PPE family protein [Mycobacterium tuberculosis]                   | GALISGSY | 0,625 | GAGICASY | sg |
| WP_011799340.1 | PPE family protein [Mycobacterium tuberculosis]                   | GAGNVGSY | 0,625 | GAGICASY | sg |
| WP_011799357.1 | PE family protein [Mycobacterium tuberculosis]                    | GAGAYASA | 0,625 | GAGICASY | sg |
| WP_011799359.1 | PE family protein [Mycobacterium tuberculosis]                    | GAGAYASA | 0,625 | GAGICASY | sg |
| WP_011799359.1 | PE family protein [Mycobacterium tuberculosis]                    | GAGISFSN | 0,625 | GAGICASY | sg |
| WP_011799380.1 | septum formation family protein [Mycobacterium]                   | LAGYIASY | 0,625 | GAGICASY | sg |
| WP_011799380.1 | septum formation family protein [Mycobacterium]                   | GAKINASF | 0,625 | GAGICASY | sg |
| WP_058901161.1 | PE family protein [Mycobacterium tuberculosis]                    | GAGGFAST | 0,625 | GAGICASY | sg |
| WP_058901161.1 | PE family protein [Mycobacterium tuberculosis]                    | GAGDFASG | 0,625 | GAGICASY | sg |
| WP_137054066.1 | PPE family protein [Mycobacterium tuberculosis]                   | GAGISGVY | 0,625 | GAGICASY | sg |
| WP_003402100.1 | protein kinase [Mycobacterium]                                    | YSFLPQLN | 0,625 | GSFCTQLN | sg |
| WP_003403834.1 | ribbon-helix-helix protein, CopG family [Mycobacterium]           | RGIDLTSN | 0,625 | KGIYQTSN | sg |
| WP_003420436.1 | DUF2330 domain-containing protein [Mycobacterium]                 | VDIYQTSR | 0,625 | KGIYQTSN | sg |
| WP_011799093.1 | CopG family transcriptional regulator [Mycobacterium]             | PGIDLTSN | 0,625 | KGIYQTSN | sg |
| WP_137054066.1 | PPE family protein [Mycobacterium tuberculosis]                   | SGIYNTSV | 0,625 | KGIYQTSN | sg |
| WP_137054066.1 | PPE family protein [Mycobacterium tuberculosis]                   | SGIYNTST | 0,625 | KGIYQTSN | sg |
| WP_003400000.1 | type VII secretion system ESX-1 subunit EccE1 [Mycobacterium]     | LYQQVIGT | 0,625 | LYQDVNCT | sg |
